# Supplementary material for: Difunctionalization of alkenes with iodine and tert-butyl hydroperoxide (TBHP) at room temperature for the synthesis of 1-(tert-butylperoxy)-2-iodoethanes
Source: PubMed Central journal article supplement (PMC5629392; doi:10.3762/bjoc.13.200), 2017-09-28
Supplement: Beilstein_J_Org_Chem-13-2023-s001.pdf [file Beilstein_J_Org_Chem-13-2023-s001.pdf]

## Supporting Information

for

# Difunctionalization of alkenes with iodine and *tert*-butyl hydroperoxide (TBHP) at room temperature for the synthesis of 1-(*tert*-butylperoxy)-2-iodoethanes

Hao Wang<sup>1</sup>, Cui Chen<sup>2</sup>, Weibing Liu<sup>\*,2</sup> and Zhibo Zhu<sup>\*,1</sup>

Address: <sup>1</sup>Integrated Hospital of Traditional Chinese Medicine, Southern Medical University, Guangzhou, 510315, P. R. China. Fax: +86- 20- 6164 8538; Tel: +86- 20-62789464 and <sup>2</sup>College of Chemical Engineering, Guangdong University of Petrochemical Technology, 2 Guandu Road, Maoming 525000, P. R. China. Fax: +86-668-2923575; Tel: +86-668-2923956

Email: Zhibo Zhu - zhuzb676@smu.edu.cn; Weibing Liu - lwb409@gdupt.edu.cn.

\*Corresponding author

### Full experimental details and copies of NMR spectral data

**General Information.** All the reactions were carried out at room temperature for 24 h in a round-bottom flask equipped with a magnetic stir bar. Unless otherwise stated, all reagents and solvents were purchased from commercial suppliers and used without further purification. <sup>1</sup>H NMR and <sup>13</sup>C NMR spectra were recorded on a 400 MHz spectrometer in solutions of CDCl<sub>3</sub>

using tetramethylsilane as the internal standard;  $\delta$  values are given in ppm, and coupling constants ( $J$ ) in Hz. HR-MS were obtained on a Q-TOF micro spectrometer.

**Typical procedure: 1-(1-(*tert*-butylperoxy)-2-iodoethyl)benzene (2a).** A mixture of styrene (**1a**) (208 mg, 2.0 mmol), I<sub>2</sub> (508 mg, 2.0 mmol), TBHP (774 mg, 6.0 mmol, 70% in water), and toluene (2.0 mL) was added successively in a round-bottom flask, and the resulting solution was stirred for 24 h at room temperature. The mixture was purified by column chromatography on silica gel to afford product **2a** with PE/ethyl acetate = 20/1 as the eluent.

**1-(1-(*tert*-Butylperoxy)-2-iodoethyl)benzene (2a)**<sup>1</sup>

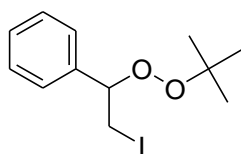

Yield: 79%; <sup>1</sup>H NMR (CDCl<sub>3</sub>, 400 Hz)  $\delta$  7.40 (m, 5H), 4.88 (d,  $J$  = 6.0 Hz, 1H), 4.55 (dd,  $J$  = 7.2 Hz,  $J$  = 6.8 Hz, 1H), 3.64 (dd,  $J$  = 10.4 Hz,  $J$  = 6.4 Hz, 1H), 3.64 (dd,  $J$  = 9.6 Hz,  $J$  = 7.2 Hz, 1H), 1.28 (s, 9H); <sup>13</sup>C NMR (CDCl<sub>3</sub>, 100 Hz)  $\delta$  138.2, 128.6, 128.4, 127.1, 85.3, 81.1, 26.5, 6.38.

**1-(1-(*tert*-Butylperoxy)-2-iodoethyl)-4-methylbenzene (2b)**

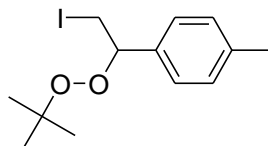

Yield: 75%; Pale yellow oil; <sup>1</sup>H NMR (CDCl<sub>3</sub>, 400 Hz)  $\delta$  7.33 (d,  $J$  = 8.0 Hz, 2H), 7.27 (d,  $J$  = 8.0 Hz, 2H), 4.55 (dd,  $J$  = 7.2 Hz,  $J$  = 6.8 Hz, 1H), 3.74 (dd,  $J$  = 10.4 Hz,  $J$  = 6.0 Hz, 1H), 3.64 (dd,  $J$  = 10.4 Hz,  $J$  = 7.6 Hz, 1H), 2.44 (s, 3H), 1.37 (s, 9H); <sup>13</sup>C NMR (CDCl<sub>3</sub>, 100 Hz)  $\delta$  138.5, 135.2, 129.2, 127.2, 85.3, 81.0, 26.6, 21.4, 6.76; HRMS (ESI): calcd for C<sub>13</sub>H<sub>19</sub>INaO<sub>2</sub>: [M+Na<sup>+</sup>] 357.0322, found 357.0329.

**2-(1-(*tert*-Butylperoxy)-2-iodoethyl)-1,4-dimethylbenzene (2c)**

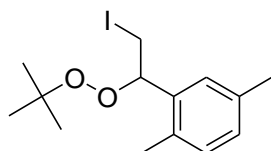

Yield: 76%; Colorless oil; <sup>1</sup>H NMR (CDCl<sub>3</sub>, 400 Hz)  $\delta$  7.20 (s, 1H), 7.27 (m, 2H), 5.33 (dd,  $J$  = 7.0 Hz,  $J$  = 6.8 Hz, 1H), 3.67 (dd,  $J$  = 10.0 Hz,  $J$  = 6.4 Hz, 1H), 3.41 (dd,  $J$  = 10.4 Hz,  $J$  = 7.6 Hz, 1H), 2.40 (s, 3H), 2.37 (s, 3H), 1.32 (s, 9H); <sup>13</sup>C NMR (CDCl<sub>3</sub>, 100 Hz)  $\delta$  136.2, 135.5, 132.9, 130.4, 129.2, 126.7, 81.8, 80.9, 26.6, 21.2, 19.1, 5.75; HRMS (ESI): calcd for C<sub>14</sub>H<sub>21</sub>INaO<sub>2</sub>: [M+Na<sup>+</sup>] 371.0478, found

371.0495.

**1-(1-(*tert*-Butylperoxy)-2-iodoethyl)-4-methoxybenzene (2d)**

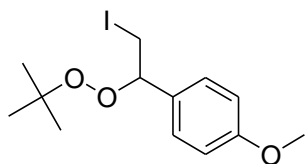

Yield: 71%; Pale yellow oil;  $^1\text{H NMR}$  ( $\text{CDCl}_3$ , 400 Hz)  $\delta$  7.29 (d,  $J = 8.0$  Hz, 2H), 6.92 (d,  $J = 8.0$  Hz, 2H), 4.99 (dd,  $J = 7.0$  Hz,  $J = 6.8$  Hz, 1H), 3.83 (s, 3H), 3.70 (dd,  $J = 10.0$  Hz,  $J = 6.4$  Hz, 1H), 3.39 (dd,  $J = 10.4$  Hz,  $J = 7.6$  Hz, 1H), 1.28 (s, 9H);  $^{13}\text{C NMR}$  ( $\text{CDCl}_3$ , 100 Hz)  $\delta$  159.8, 130.0, 128.5, 113.8, 85.1, 81.0, 55.2, 26.4, 6.71; HRMS (ESI): calcd for  $\text{C}_{13}\text{H}_{19}\text{I}\text{NaO}_3$ :  $[\text{M}+\text{Na}^+]$  373.0271, found 373.0279.

**1-(1-(*tert*-Butylperoxy)-2-iodoethyl)-4-chlorobenzene (2e)**

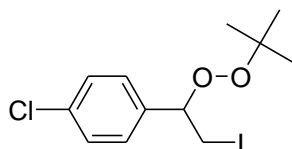

Yield: 82%; Pale yellow oil;  $^1\text{H NMR}$  ( $\text{CDCl}_3$ , 400 Hz)  $\delta$  7.38 (d,  $J = 8.0$  Hz, 2H), 7.30 (d,  $J = 8.0$  Hz, 2H), 5.00 (dd,  $J = 7.0$  Hz,  $J = 6.8$  Hz, 1H), 3.59 (dd,  $J = 10.0$  Hz,  $J = 6.4$  Hz, 1H), 3.36 (dd,  $J = 10.4$  Hz,  $J = 7.6$  Hz, 1H), 1.28 (s, 9H);  $^{13}\text{C NMR}$  ( $\text{CDCl}_3$ , 100 Hz)  $\delta$  136.8, 134.4, 128.7, 128.4, 84.5, 81.2, 26.5, 5.91; HRMS (ESI): calcd for  $\text{C}_{12}\text{H}_{16}\text{ClI}\text{NaO}_2$ :  $[\text{M}+\text{Na}^+]$  376.9776, found 376.9788.

**1-(1-(*tert*-Butylperoxy)-2-iodoethyl)-3-chlorobenzene (2f)**

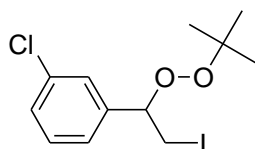

Yield: 85%; Pale yellow oil;  $^1\text{H NMR}$  ( $\text{CDCl}_3$ , 400 Hz)  $\delta$  7.36 (s, 1H), 7.31 (m, 2H), 7.25 (m, 1H), 4.98 (dd,  $J = 7.0$  Hz,  $J = 6.8$  Hz, 1H), 3.57 (dd,  $J = 10.0$  Hz,  $J = 6.4$  Hz, 1H), 3.36 (dd,  $J = 10.4$  Hz,  $J = 7.6$  Hz, 1H), 1.29 (s, 9H);  $^{13}\text{C NMR}$  ( $\text{CDCl}_3$ , 100 Hz)  $\delta$  140.5, 134.3, 129.7, 128.7, 127.1, 125.2, 84.5, 81.3, 26.5, 5.59; HRMS (ESI): calcd for  $\text{C}_{12}\text{H}_{16}\text{ClI}\text{NaO}_2$ :  $[\text{M}+\text{Na}^+]$  376.9776, found 376.9784.

**1-(1-(*tert*-Butylperoxy)-2-iodoethyl)-2-chlorobenzene (2g)**

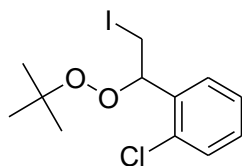

Yield: 79%; Pale yellow oil;  $^1\text{H NMR}$  ( $\text{CDCl}_3$ , 400 Hz)  $\delta$  7.52 (dd,  $J = 2.0$  Hz,  $J = 7.6$  Hz, 1H), 7.35 (m,

3H), 4.45 (dd,  $J = 7.0$  Hz,  $J = 6.8$  Hz, 1H), 3.54 (dd,  $J = 10.0$  Hz,  $J = 6.4$  Hz, 1H), 3.39 (dd,  $J = 10.4$  Hz,  $J = 7.6$  Hz, 1H), 1.33 (s, 9H);  $^{13}\text{C}$  NMR ( $\text{CDCl}_3$ , 100 Hz)  $\delta$  136.7, 132.7, 129.5, 129.4, 127.8, 126.9, 81.4, 80.9, 26.5, 4.41; HRMS (ESI): calcd for  $\text{C}_{12}\text{H}_{16}\text{ClINaO}_2$ :  $[\text{M}+\text{Na}^+]$  376.9776, found 376.9778.

**1-(1-(*tert*-Butylperoxy)-2-iodoethyl)-4-fluorobenzene (2h)**

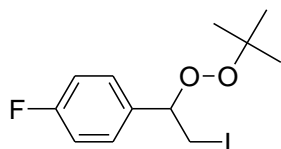

Yield: 85%; Colorless oil;  $^1\text{H}$  NMR ( $\text{CDCl}_3$ , 400 Hz)  $\delta$  7.32 (d, Hz,  $J = 7.6$  Hz, 2H), 7.07 (d, Hz,  $J = 7.6$  Hz, 2H), 5.00 (dd,  $J = 7.0$  Hz,  $J = 6.8$  Hz, 1H), 3.62 (dd,  $J = 10.0$  Hz,  $J = 6.4$  Hz, 1H), 3.36 (dd,  $J = 10.4$  Hz,  $J = 7.6$  Hz, 1H), 1.27 (s, 9H);  $^{13}\text{C}$  NMR ( $\text{CDCl}_3$ , 100 Hz)  $\delta$  161.8 (d,  $^1J_{\text{C-F}} = 182.4$  Hz), 134.0 (d,  $^4J_{\text{C-F}} = 12.8$  Hz), 128.8 (d,  $^3J_{\text{C-F}} = 32.8$  Hz), 115.4 (d,  $^2J_{\text{C-F}} = 85.6$  Hz), 84.6, 81.1, 26.5, 6.2; HRMS (ESI): calcd for  $\text{C}_{12}\text{H}_{16}\text{FINaO}_2$ :  $[\text{M}+\text{Na}^+]$  361.0071, found 361.0079.

**1-(1-(*tert*-Butylperoxy)-2-iodoethyl)-3-fluorobenzene (2i)**

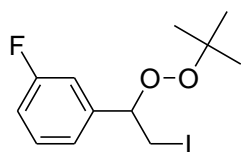

Yield: 82%; Colorless oil;  $^1\text{H}$  NMR ( $\text{CDCl}_3$ , 400 Hz)  $\delta$  7.33 (m, 1H), 7.08 (m, 3H), 5.00 (dd,  $J = 7.0$  Hz,  $J = 6.8$  Hz, 1H), 3.56 (dd,  $J = 10.0$  Hz,  $J = 6.4$  Hz, 1H), 3.36 (dd,  $J = 10.4$  Hz,  $J = 7.6$  Hz, 1H), 1.28 (s, 9H);  $^{13}\text{C}$  NMR ( $\text{CDCl}_3$ , 100 Hz)  $\delta$  163.9 (d,  $^1J_{\text{C-F}} = 179.2$  Hz), 141.0 (d,  $^3J_{\text{C-F}} = 28.0$  Hz), 129.9 (d,  $^3J_{\text{C-F}} = 32.4$  Hz), 122.7 (d,  $^4J_{\text{C-F}} = 11.6$  Hz), 115.5 (d,  $^2J_{\text{C-F}} = 84.0$  Hz), 113.9 (d,  $^2J_{\text{C-F}} = 84.0$  Hz), 84.4, 81.2, 26.5, 5.6; HRMS (ESI): calcd for  $\text{C}_{12}\text{H}_{16}\text{FINaO}_2$ :  $[\text{M}+\text{Na}^+]$  361.0071, found 361.0088.

**1-(2-(*tert*-Butylperoxy)-1-iodopropan-2-yl)-4-methylbenzene (2j)**

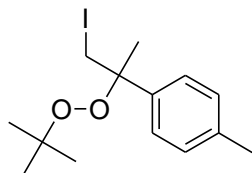

Yield: 77%; Colorless oil;  $^1\text{H}$  NMR ( $\text{CDCl}_3$ , 400 Hz)  $\delta$  7.41 (d,  $J = 8.0$  Hz, 2H), 7.24 (d,  $J = 8.0$  Hz, 2H), 3.70 (s, 2H), 2.43 (s, 3H), 1.86 (s, 3H), 1.38 (s, 9H);  $^{13}\text{C}$  NMR ( $\text{CDCl}_3$ , 100 Hz)  $\delta$  139.3, 137.2, 128.9, 125.9, 81.1, 79.7, 26.8, 24.4, 21.2, 15.8; HRMS (ESI): calcd for  $\text{C}_{14}\text{H}_{21}\text{INaO}_2$ :  $[\text{M}+\text{Na}^+]$  371.0478, found 371.0465.

**1-(2-(*tert*-Butylperoxy)-1-iodopropan-2-yl)benzene (2k)**

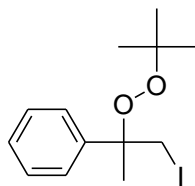

Yield: 77%; Colorless oil;  $^1\text{H}$  NMR ( $\text{CDCl}_3$ , 400 Hz)  $\delta$  7.54 (d,  $J = 8.0$  Hz, 2H), 7.45 (t,  $J = 8.0$  Hz, 2H), 7.38 (t,  $J = 8.0$  Hz, 1H), 3.73 (s, 2H), 1.89 (s, 3H), 1.41 (s, 9H);  $^{13}\text{C}$  NMR ( $\text{CDCl}_3$ , 100 Hz)  $\delta$  142.3, 128.2, 127.6, 125.9, 81.2, 79.7, 26.9, 24.5, 15.6; HRMS (ESI): calcd for  $\text{C}_{13}\text{H}_{19}\text{INaO}_2$ :  $[\text{M}+\text{Na}^+]$  357.0322, found 357.0337.

### 1-(*tert*-Butylperoxy)-2-iodo-1,1-diphenylethane (2l) <sup>1</sup>

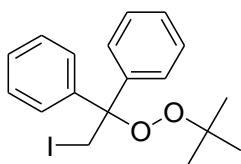

Yield: 83%;  $^1\text{H}$  NMR ( $\text{CDCl}_3$ , 400 Hz)  $\delta$  7.44 (m, 4H), 7.35 (m, 6H), 4.39 (s, 2H), 1.35 (s, 9H);  $^{13}\text{C}$  NMR ( $\text{CDCl}_3$ , 100 Hz)  $\delta$  142.6, 127.8, 127.4, 127.1, 84.4, 79.9, 26.9, 15.3.

### 1-(3-(*tert*-Butylperoxy)-4-iodobutyl)benzene (2m)

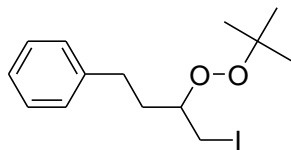

Yield: 80%; Pale yellow oil;  $^1\text{H}$  NMR ( $\text{CDCl}_3$ , 400 Hz)  $\delta$  7.29 (d,  $J = 7.2$  Hz, 2H), 7.21 (m, 3H), 2.36 (m, 1H), 3.83 (m, 1H), 3.48 (m, 1H), 3.36 (m, 1H), 2.74 (m, 2H), 1.98 (m, 2H), 1.28 (s, 9H);  $^{13}\text{C}$  NMR ( $\text{CDCl}_3$ , 100 Hz)  $\delta$  141.3, 128.4, 128.3, 126.0, 81.1, 80.4, 34.3, 31.6, 26.6, 8.92; HRMS (ESI): calcd for  $\text{C}_{14}\text{H}_{21}\text{INaO}_2$ :  $[\text{M}+\text{Na}^+]$  371.0478, found 371.0467.

### 3-(*tert*-Butylperoxy)-3-ethyl-2-iodopentane (2n)

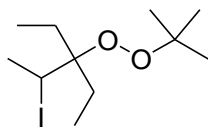

Yield: 81%; Orange oil;  $^1\text{H}$  NMR ( $\text{CDCl}_3$ , 400 Hz)  $\delta$  4.66 (q,  $J = 7.6$  Hz, 1H), 1.96 (s, 3H), 1.78 (m, 4H), 1.23 (s, 9H), 0.95 (m, 6H);  $^{13}\text{C}$  NMR ( $\text{CDCl}_3$ , 100 Hz)  $\delta$  83.6, 78.7, 35.9, 27.1, 26.7, 26.2, 23.9, 8.69, 8.57; HRMS (ESI): calcd for  $\text{C}_{11}\text{H}_{23}\text{INaO}_2$ :  $[\text{M}+\text{Na}^+]$  337.0635, found 337.0639.

### 2-(*tert*-Butylperoxy)-1-iodooctane (2o)

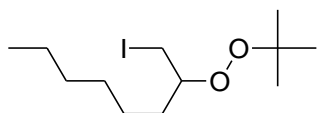

Yield: 70%; Orange oil;  $^1\text{H}$  NMR ( $\text{CDCl}_3$ , 400 Hz)  $\delta$  3.77 (m, 1H), 3.47 (dd,  $J = 10.0$  Hz,  $J = 3.2$  Hz, 1H), 3.32 (dd,  $J = 10.0$  Hz,  $J = 3.2$  Hz, 1H), 1.61 (m, 3H), 1.32 (m, 7H), 1.25 (s, 9H), 0.89 (t,  $J = 7.6$  Hz, 3H);  $^{13}\text{C}$  NMR ( $\text{CDCl}_3$ , 100 Hz)  $\delta$  81.9, 80.3, 32.5, 31.6, 29.1, 26.5, 25.4, 22.5, 14.0, 9.34; HRMS (ESI): calcd for  $\text{C}_{12}\text{H}_{25}\text{I}\text{NaO}_2$ :  $[\text{M}+\text{Na}^+]$  351.0791, found 351.0782.

**1-(2-(*tert*-Butylperoxy)-3-iodopropyl)benzene (2p)**

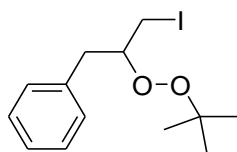

Yield: 78%; Orange oil;  $^1\text{H}$  NMR ( $\text{CDCl}_3$ , 400 Hz)  $\delta$  7.31 (m, 5H), 4.04 (m, 1H), 3.43 (dd,  $J = 10.0$  Hz,  $J = 3.2$  Hz, 1H), 3.31 (dd,  $J = 10.0$  Hz,  $J = 3.2$  Hz, 1H), 3.02 (dd,  $J = 14.0$  Hz,  $J = 6.8$  Hz, 1H), 2.92 (dd,  $J = 14.0$  Hz,  $J = 6.8$  Hz, 1H), 1.20 (s, 9H);  $^{13}\text{C}$  NMR ( $\text{CDCl}_3$ , 100 Hz)  $\delta$  137.2, 129.5, 128.3, 126.6, 83.0, 80.7, 38.5, 26.4, 8.13; HRMS (ESI): calcd for  $\text{C}_{13}\text{H}_{19}\text{I}\text{NaO}_2$ :  $[\text{M}+\text{Na}^+]$  357.0322, found 357.0329.

**1-(1-(*tert*-Butylperoxy)-2-iodoethyl)-4-benzylbenzene (2q)**

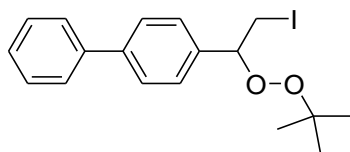

Yield: 83%; Colorless oil;  $^1\text{H}$  NMR ( $\text{CDCl}_3$ , 400 Hz)  $\delta$  7.63 (d,  $J = 7.6$  Hz, 4H), 7.46 (m, 4H), 7.38 (t,  $J = 7.6$  Hz, 1H), 5.10 (t,  $J = 6.8$  Hz, 1H), 3.70 (dd,  $J = 10.0$  Hz,  $J = 6.4$  Hz, 1H), 3.46 (dd,  $J = 10.0$  Hz,  $J = 6.4$  Hz, 1H), 1.33 (s, 9H);  $^{13}\text{C}$  NMR ( $\text{CDCl}_3$ , 100 Hz)  $\delta$  141.5, 140.6, 137.2, 128.8, 127.5, 127.4, 127.2, 127.1, 85.1, 81.2, 26.5, 6.27; HRMS (ESI): calcd for  $\text{C}_{18}\text{H}_{21}\text{I}\text{NaO}_2$ :  $[\text{M}+\text{Na}^+]$  419.0478, found 419.0486.

**1-*tert*-Butyl-4-(1-(*tert*-butylperoxy)-2-iodoethyl)benzene (2r)**

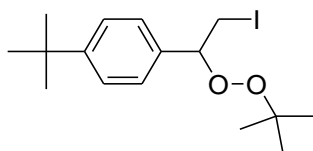

Yield: 82%; Orange oil;  $^1\text{H}$  NMR ( $\text{CDCl}_3$ , 400 Hz)  $\delta$  7.42 (d,  $J = 7.6$  Hz, 2H), 7.31 (d,  $J = 7.6$  Hz, 2H), 5.05 (t,  $J = 6.8$  Hz, 1H), 3.68 (dd,  $J = 10.0$  Hz,  $J = 3.6$  Hz, 1H), 3.43 (dd,  $J = 10.0$  Hz,  $J = 3.6$  Hz, 1H), 1.37 (s, 9H), 1.32 (s, 9H);  $^{13}\text{C}$  NMR ( $\text{CDCl}_3$ , 100 Hz)  $\delta$  151.4, 135.1, 126.8, 125.4, 85.2, 81.0, 34.6, 31.4, 26.6, 6.58; HRMS (ESI): calcd for  $\text{C}_{16}\text{H}_{25}\text{I}\text{NaO}_2$ :  $[\text{M}+\text{Na}^+]$  399.0791, found 399.0795.

**1-(1-(*tert*-Butylperoxy)-2-iodoethyl)-4-(chloromethyl)benzene (2s)**

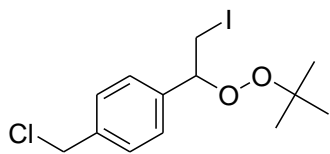

Yield: 76%; Orange oil;  $^1\text{H NMR}$  ( $\text{CDCl}_3$ , 400 Hz)  $\delta$  7.41 (d,  $J = 7.6$  Hz, 2H), 7.36 (d,  $J = 7.6$  Hz, 2H), 5.03 (t,  $J = 6.8$  Hz, 1H), 4.59 (s, 2H), 3.68 (dd,  $J = 10.0$  Hz,  $J = 6.0$  Hz, 1H), 3.43 (dd,  $J = 10.0$  Hz,  $J = 6.0$  Hz, 1H), 1.29 (s, 9H);  $^{13}\text{C NMR}$  ( $\text{CDCl}_3$ , 100 Hz)  $\delta$  138.6, 137.7, 128.7, 127.4, 84.8, 81.2, 45.9, 26.5, 6.14; HRMS (ESI): calcd for  $\text{C}_{13}\text{H}_{18}\text{ClINaO}_2$ :  $[\text{M}+\text{Na}^+]$  390.9932, found 390.9939.

**1-(*tert*-Butylperoxy)-2-iodo-1-methylcyclopentane (2t)**

Yield: 80%; Pale red oil;  $^1\text{H NMR}$  ( $\text{CDCl}_3$ , 400 Hz)  $\delta$  4.66 (d,  $J = 6.0$  Hz, 1H), 2.44 (m, 1H), 2.04 (m, 1H), 1.84 (m, 3H), 1.69 (m, 1H), 1.55 (s, 3H), 1.19 (s, 9H);  $^{13}\text{C NMR}$  ( $\text{CDCl}_3$ , 100 Hz)  $\delta$  90.7, 78.7, 37.4, 36.6, 33.3, 26.6, 25.2, 22.5; HRMS (ESI): calcd for  $\text{C}_{10}\text{H}_{19}\text{INaO}_2$ :  $[\text{M}+\text{Na}^+]$  321.0322, found 321.0336.

## NMR spectra

### 1-(1-(*tert*-Butylperoxy)-2-iodoethyl)benzene (2a)

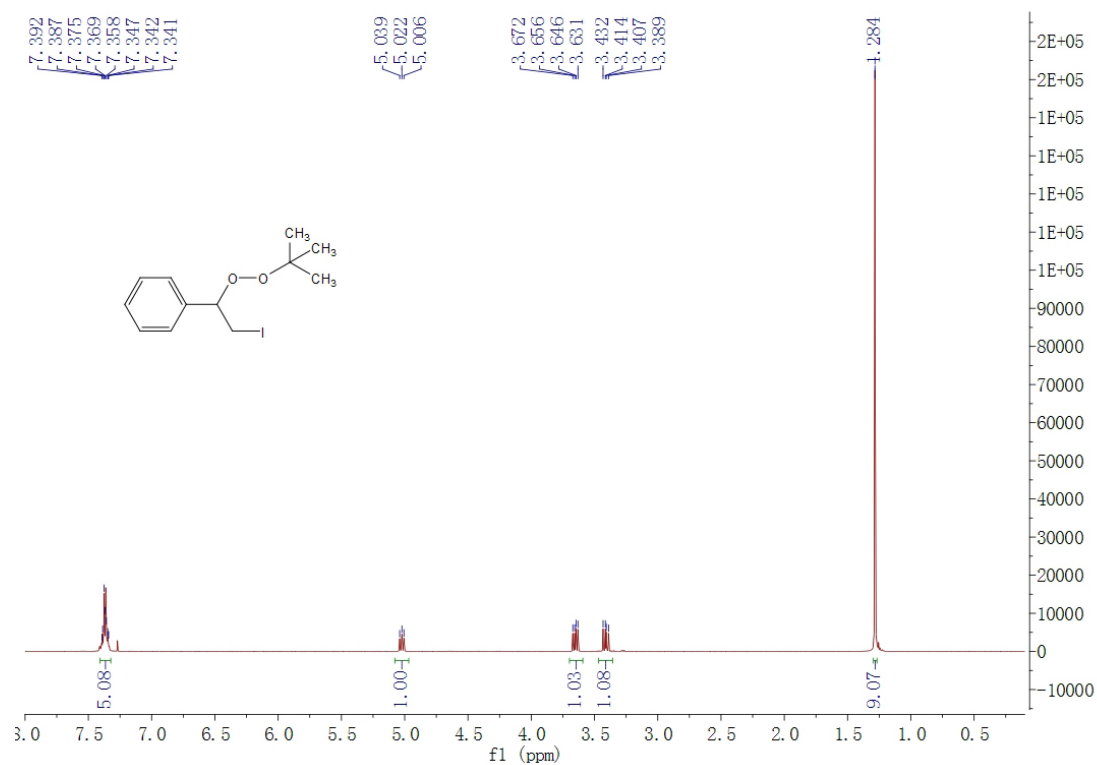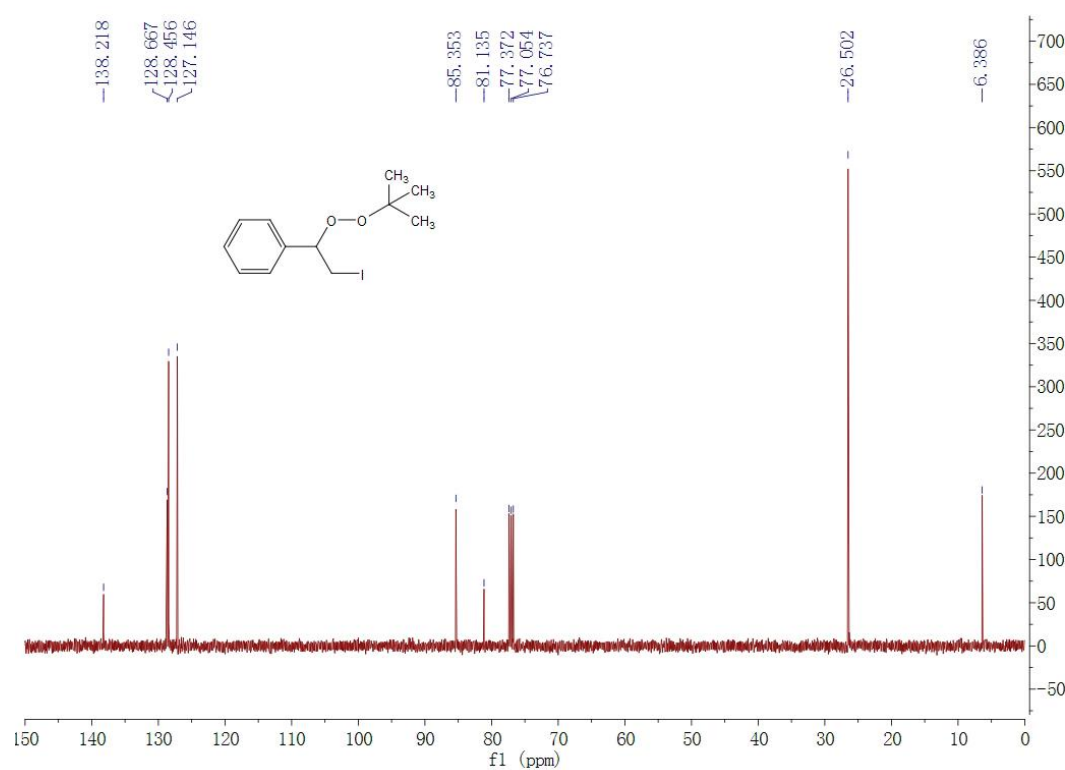



**1-(1-(*tert*-Butylperoxy)-2-iodoethyl)-4-methylbenzene (2b)**

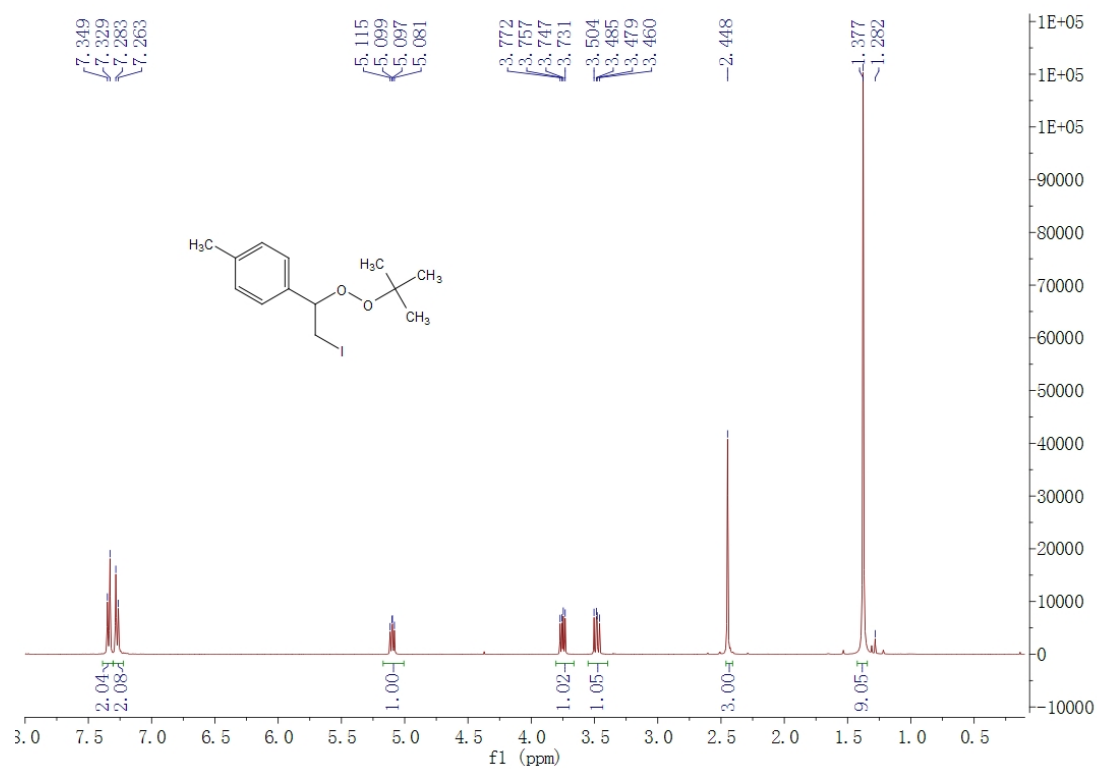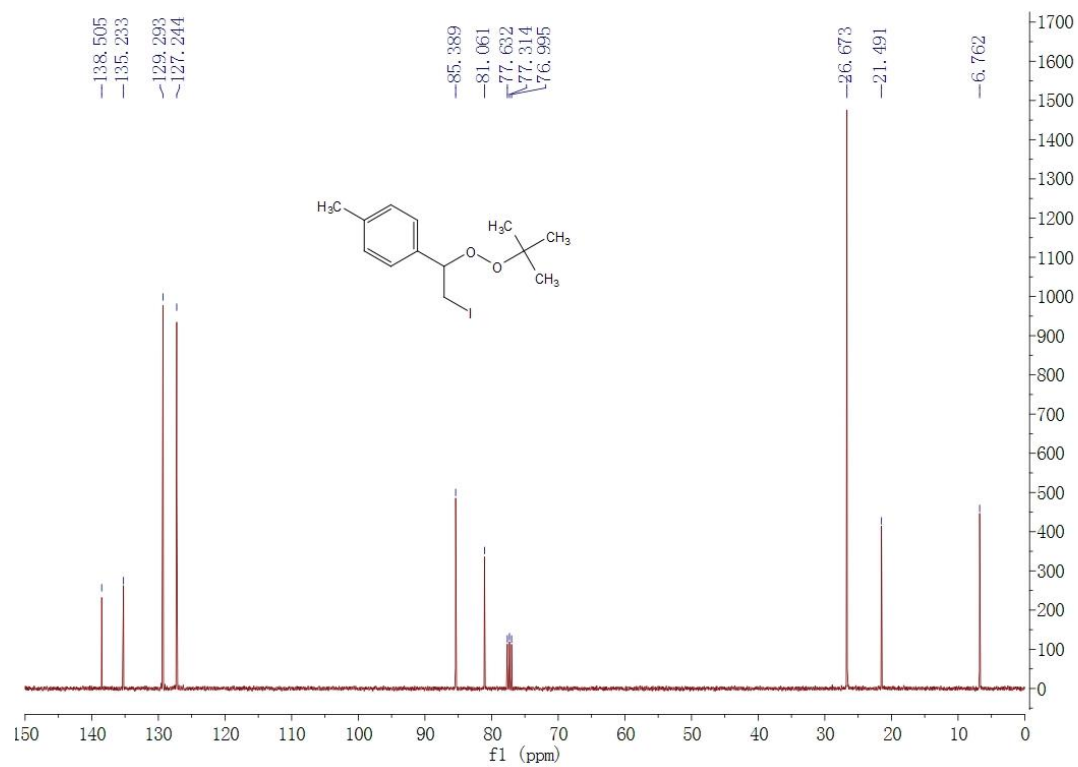

**2-(1-(*tert*-Butylperoxy)-2-iodoethyl)-1,4-dimethylbenzene (2c)**

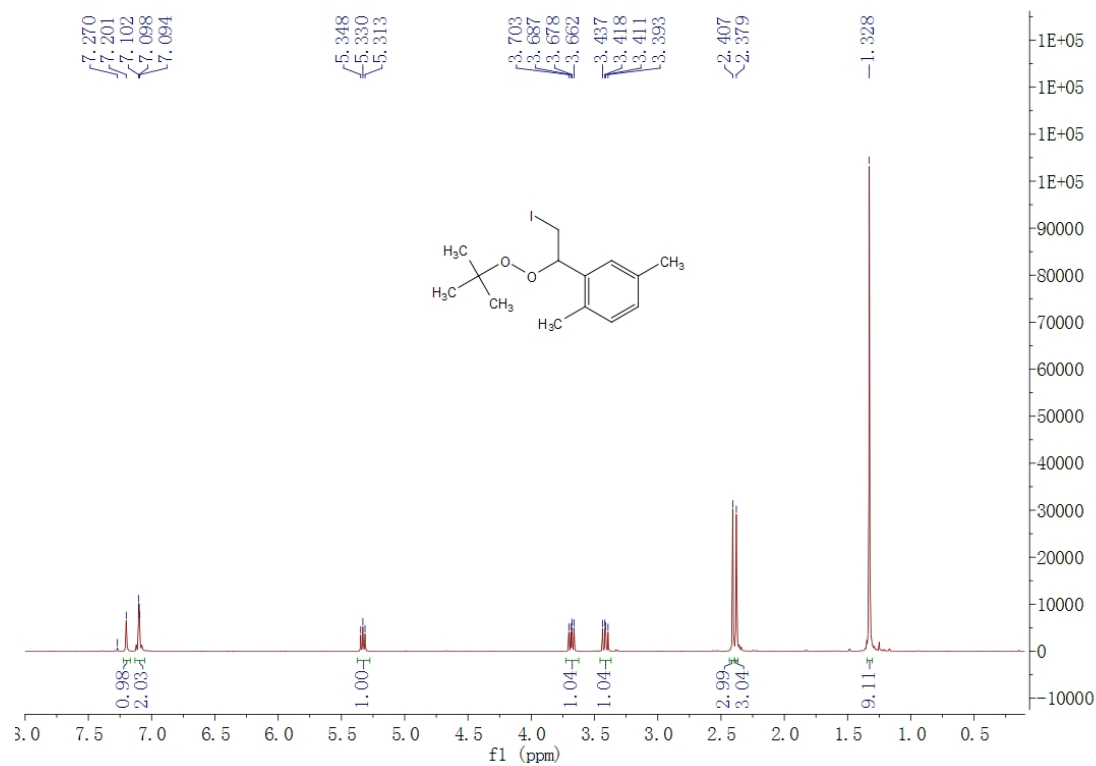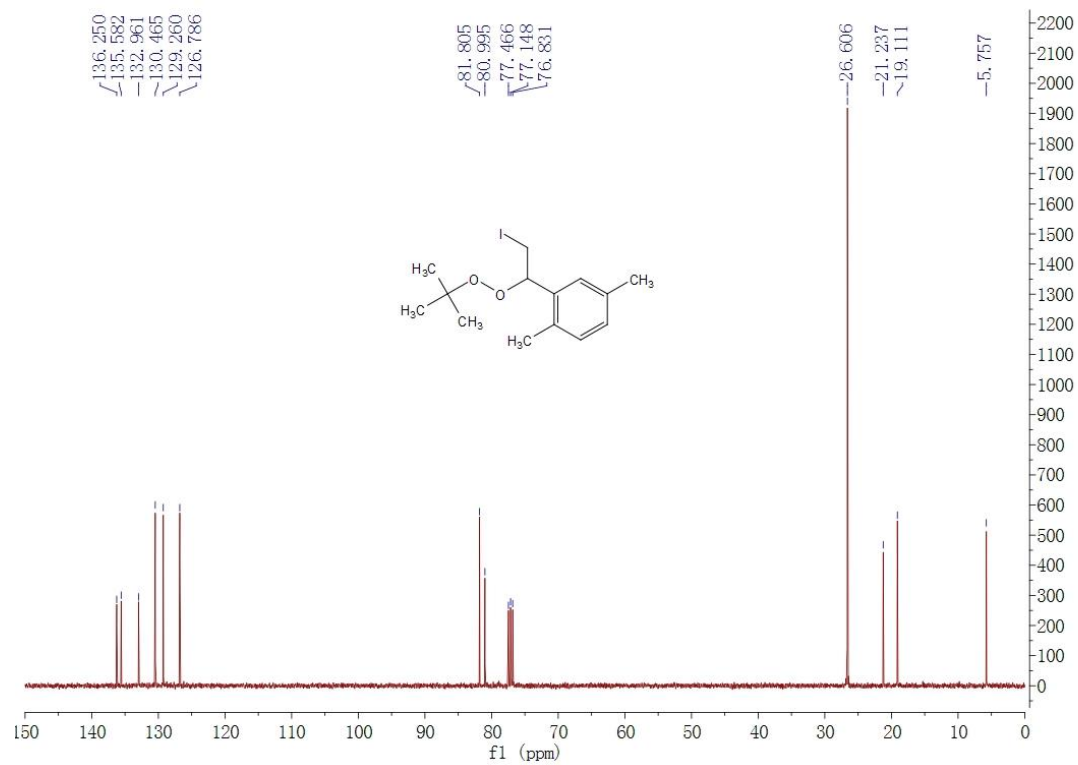

**1-(1-(*tert*-Butylperoxy)-2-iodoethyl)-4-methoxybenzene (2d)**

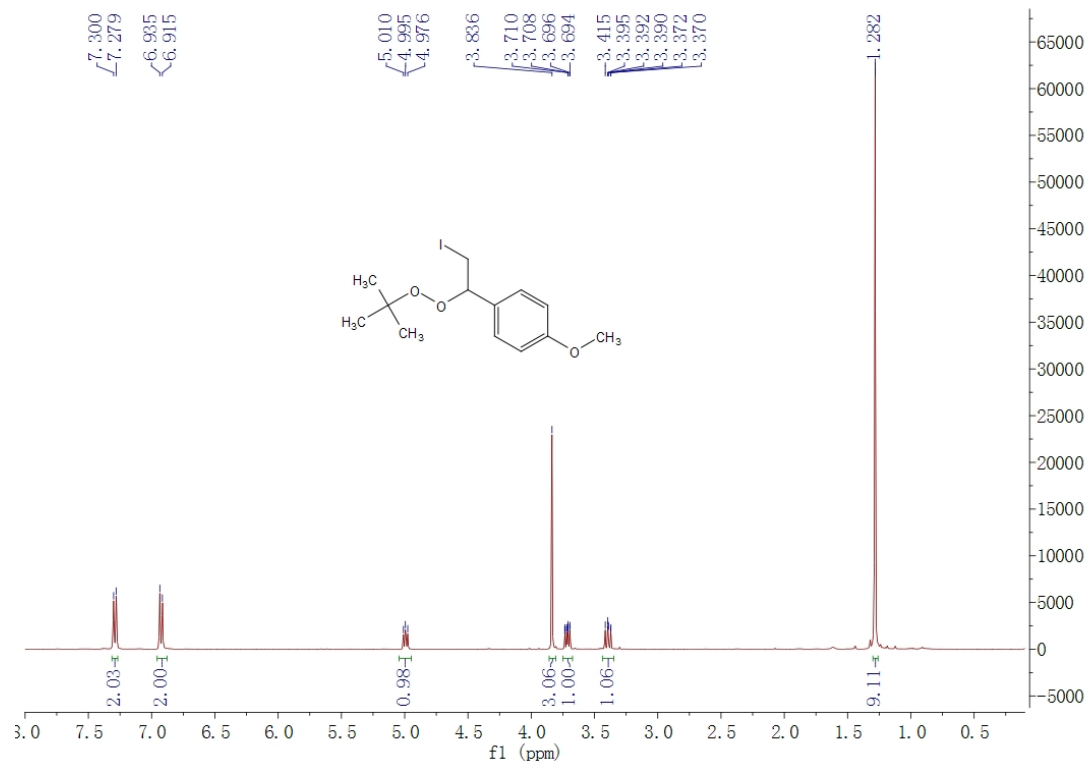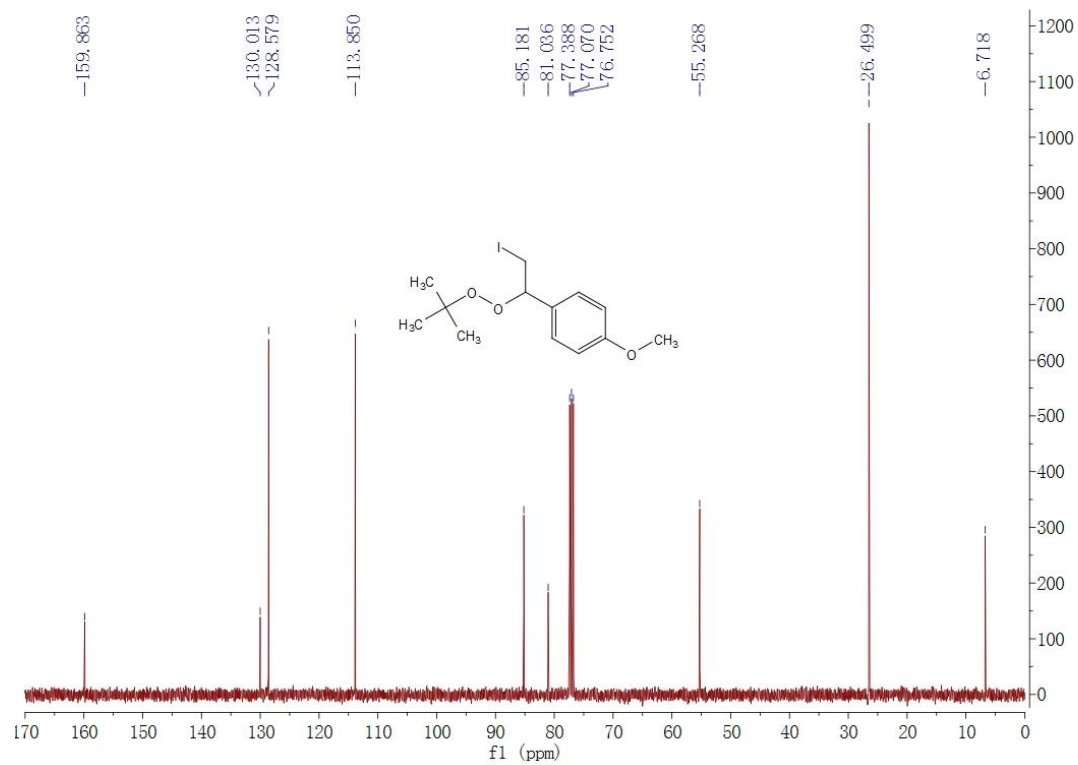

**1-(1-(*tert*-Butylperoxy)-2-iodoethyl)-4-chlorobenzene (2e)**

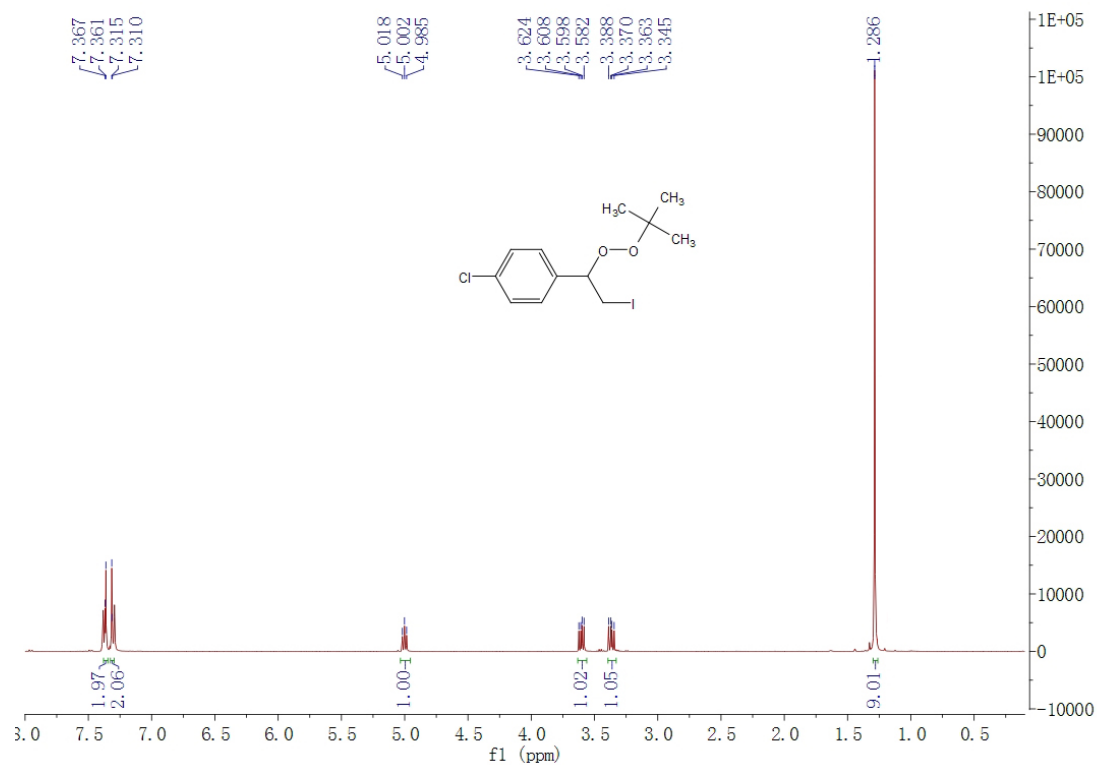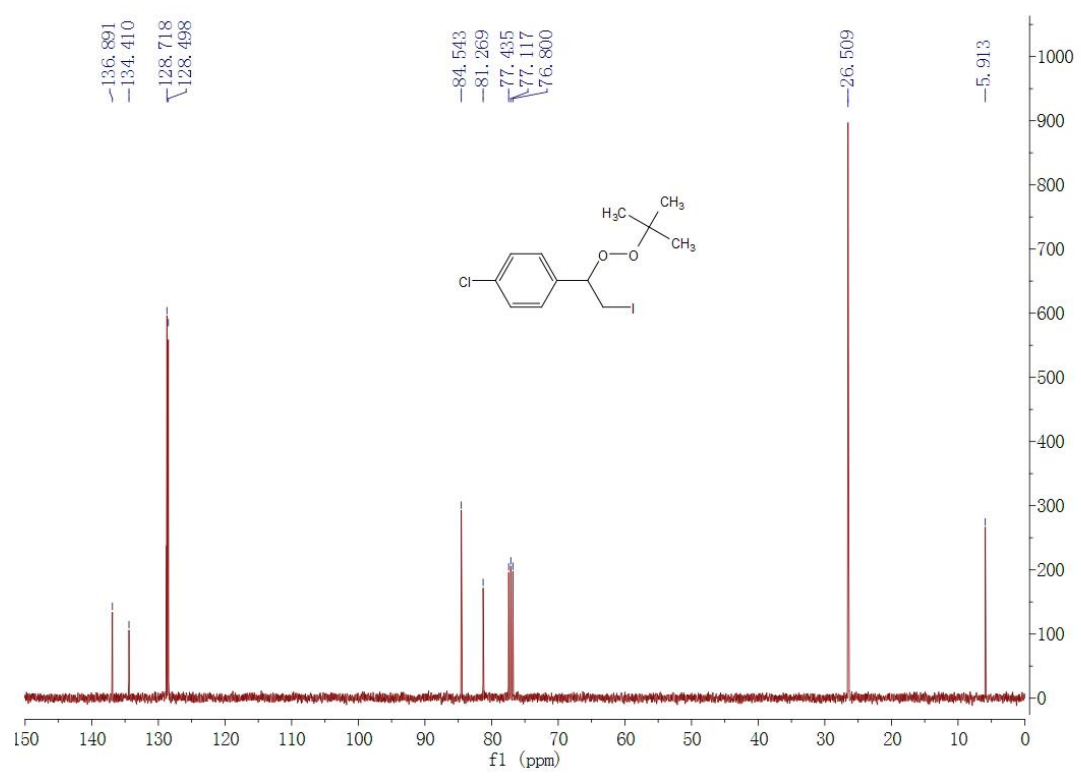

**1-(1-(*tert*-Butylperoxy)-2-iodoethyl)-2-chlorobenzene (2g)**

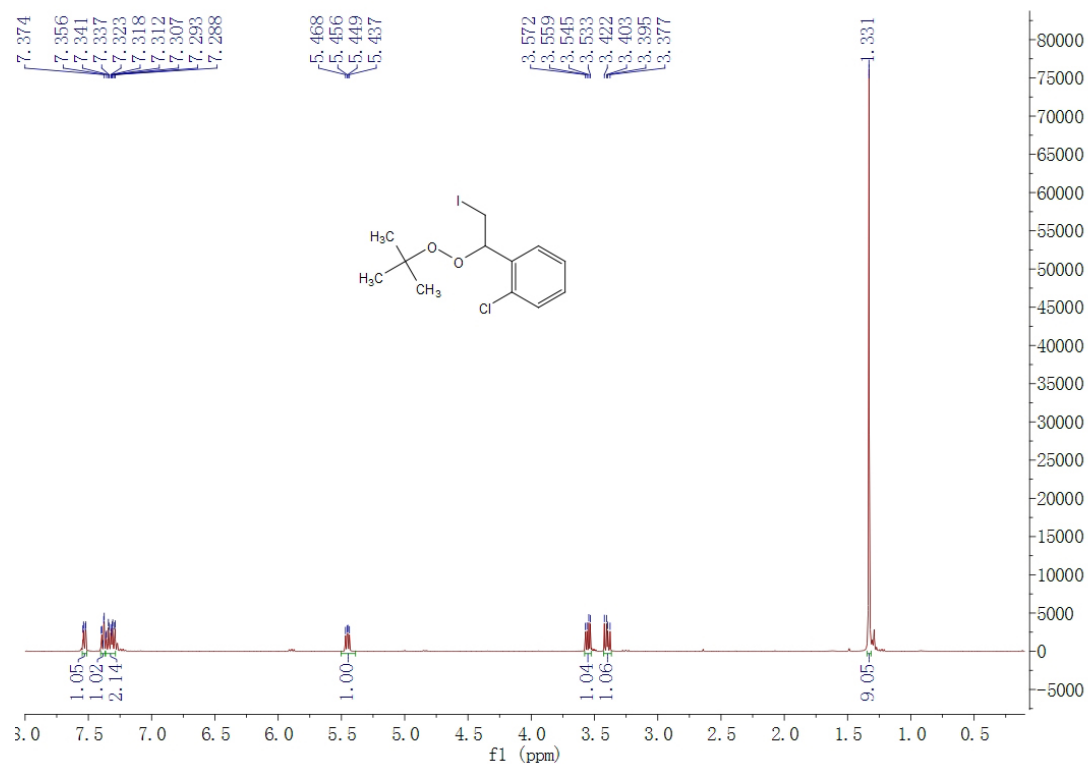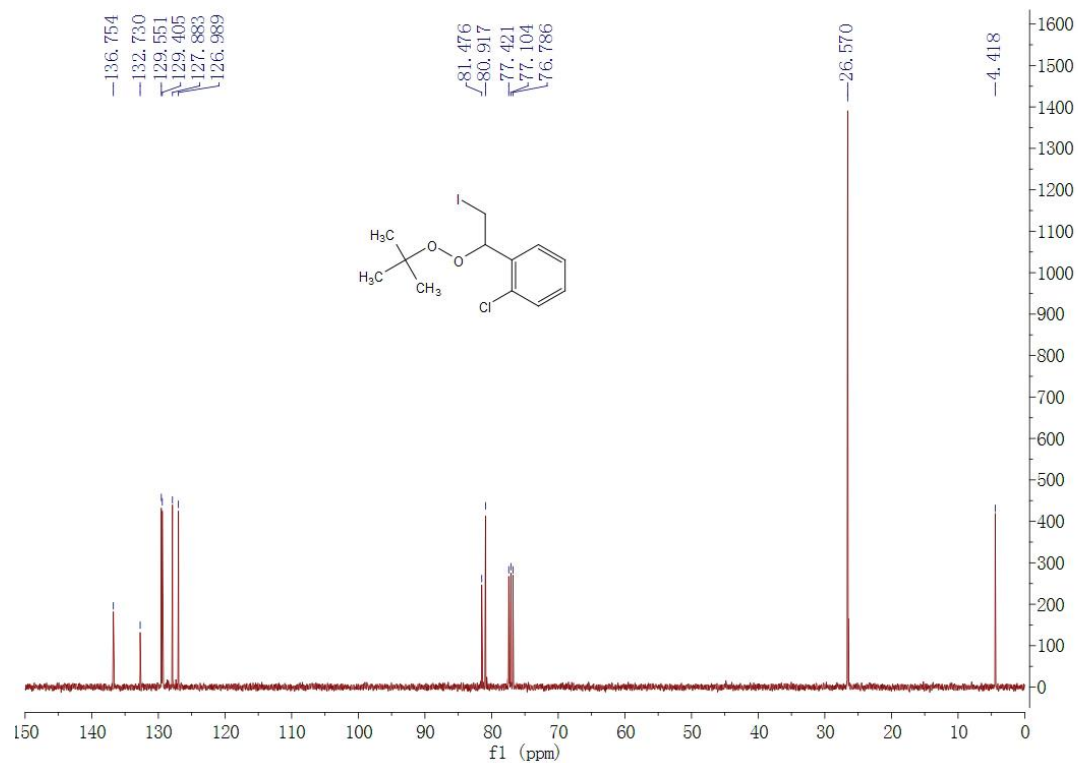

**1-(1-(*tert*-Butylperoxy)-2-iodoethyl)-4-fluorobenzene (2h)**

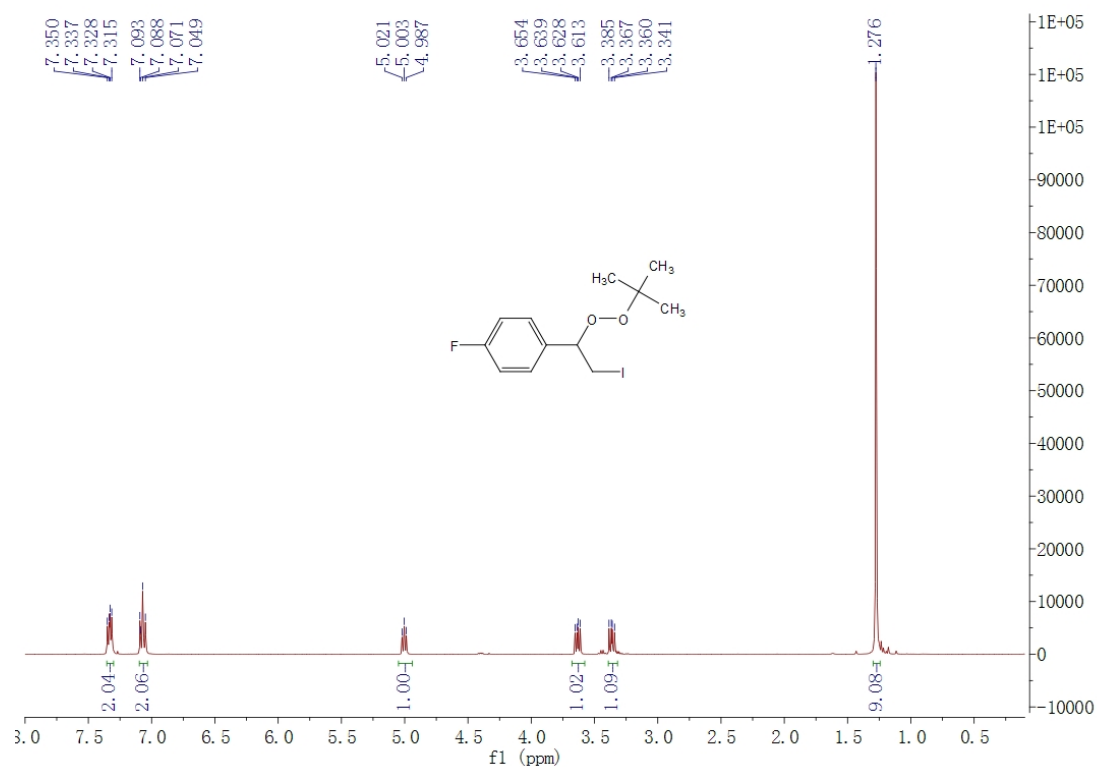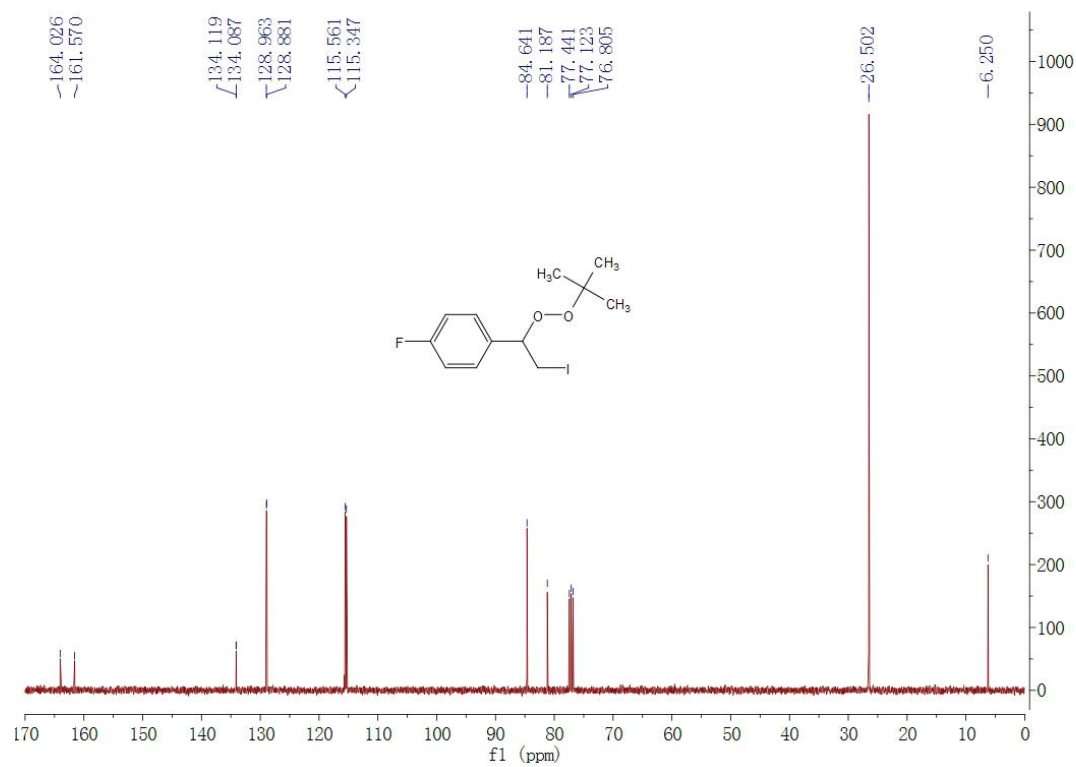

**1-(1-(*tert*-Butylperoxy)-2-iodoethyl)-3-fluorobenzene (2i)**

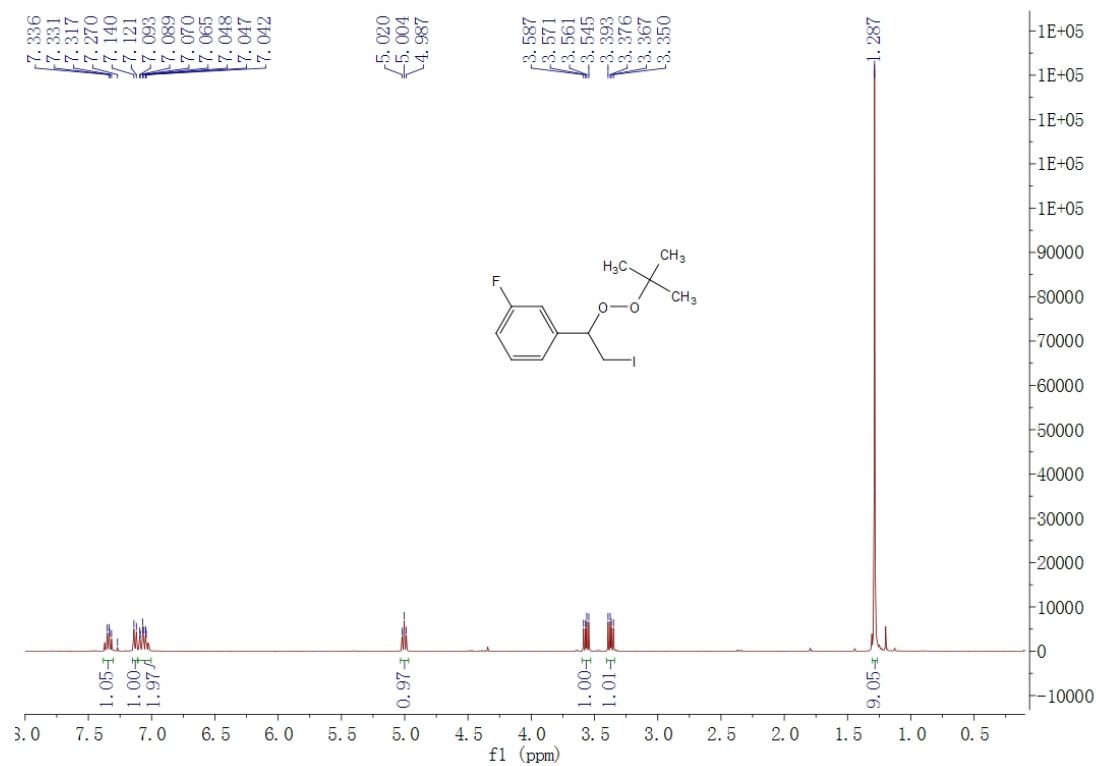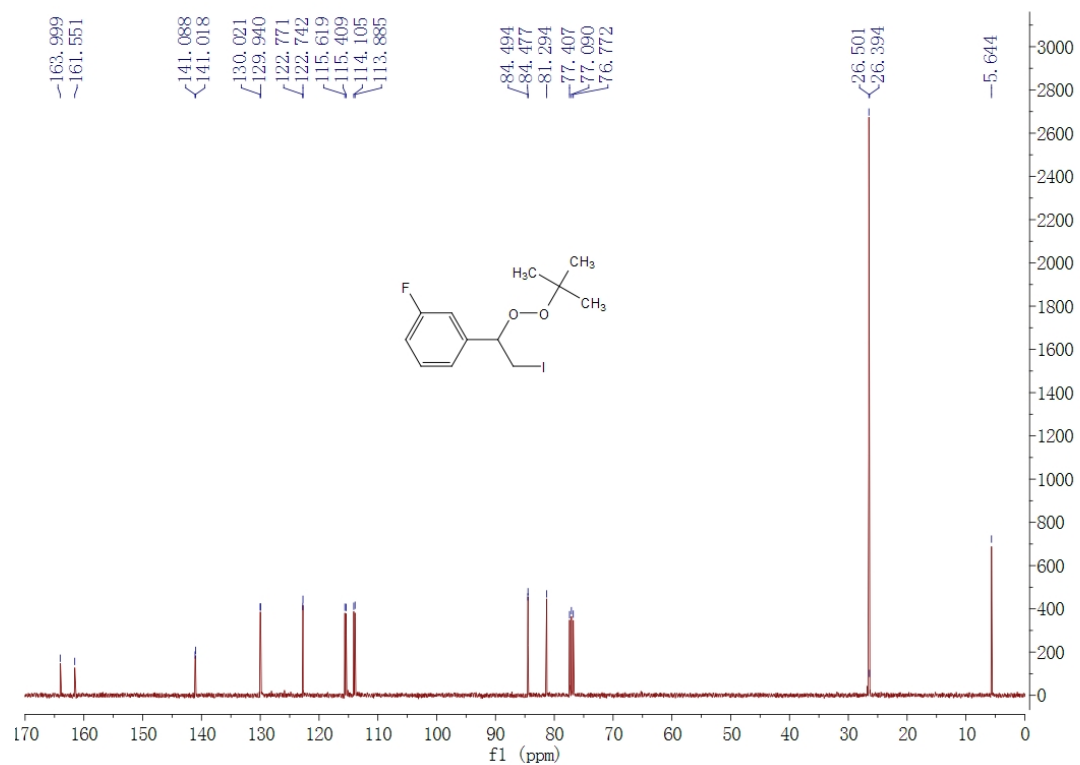

**1-(2-(*tert*-Butylperoxy)-1-iodopropan-2-yl)-4-methylbenzene (2j)**

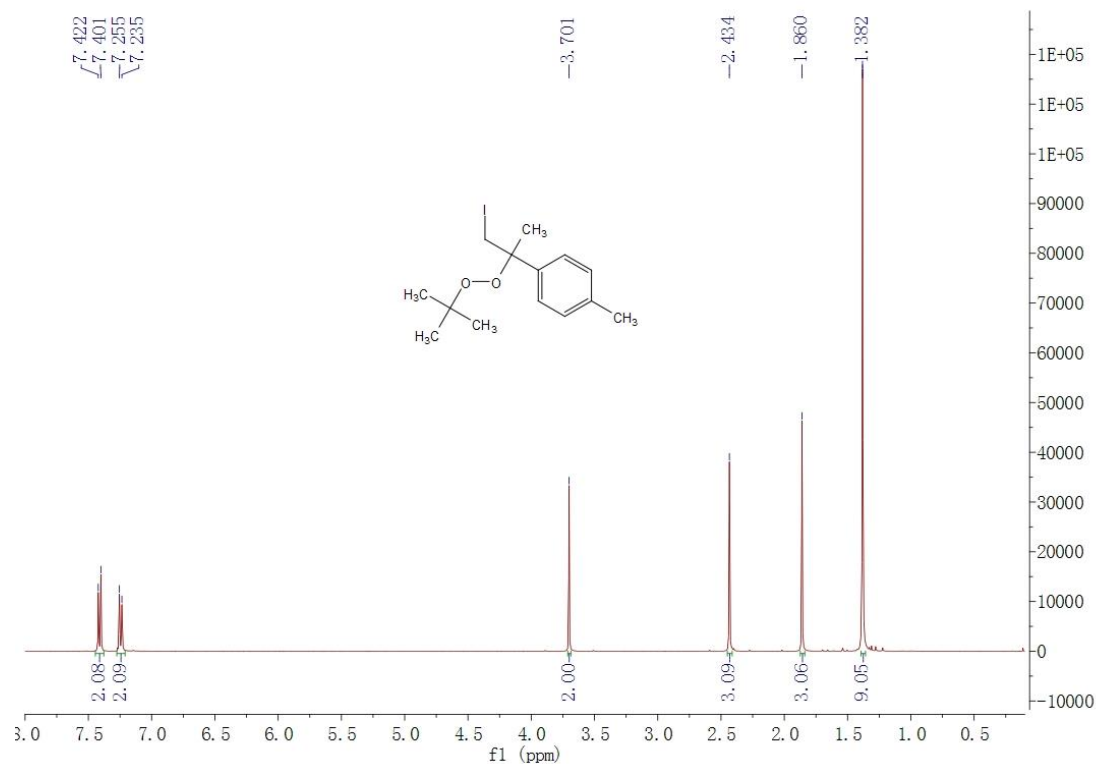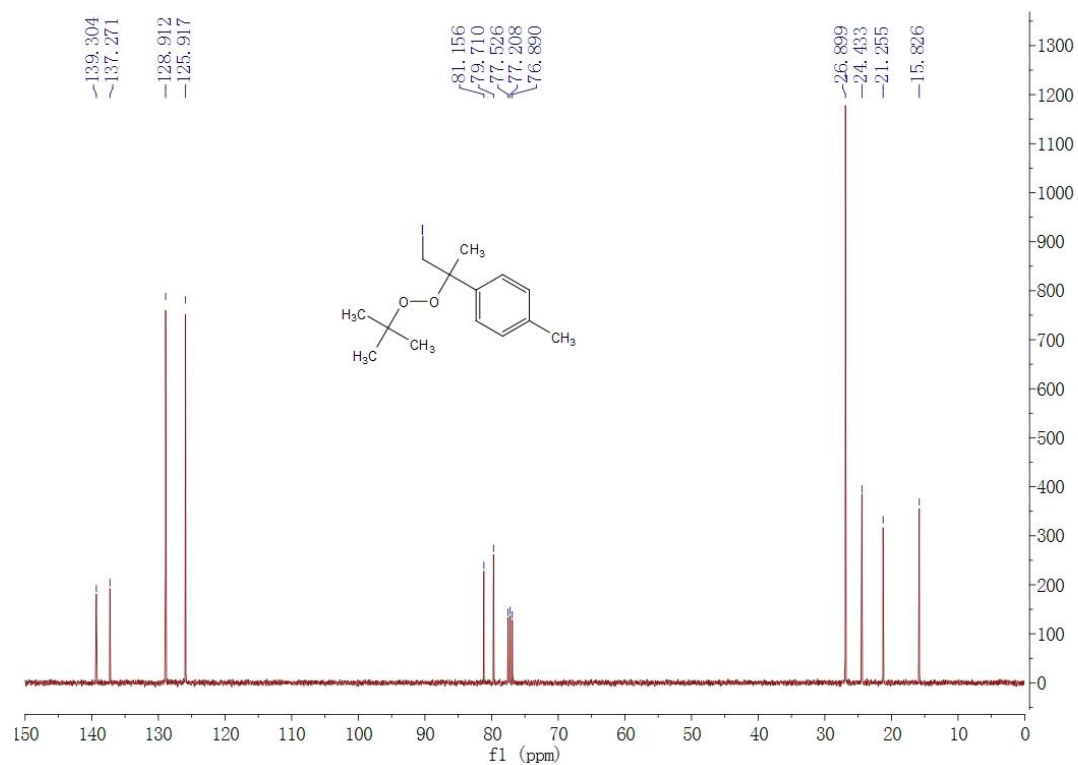



**1-(2-(*tert*-Butylperoxy)-1-iodopropan-2-yl)benzene (2k)**

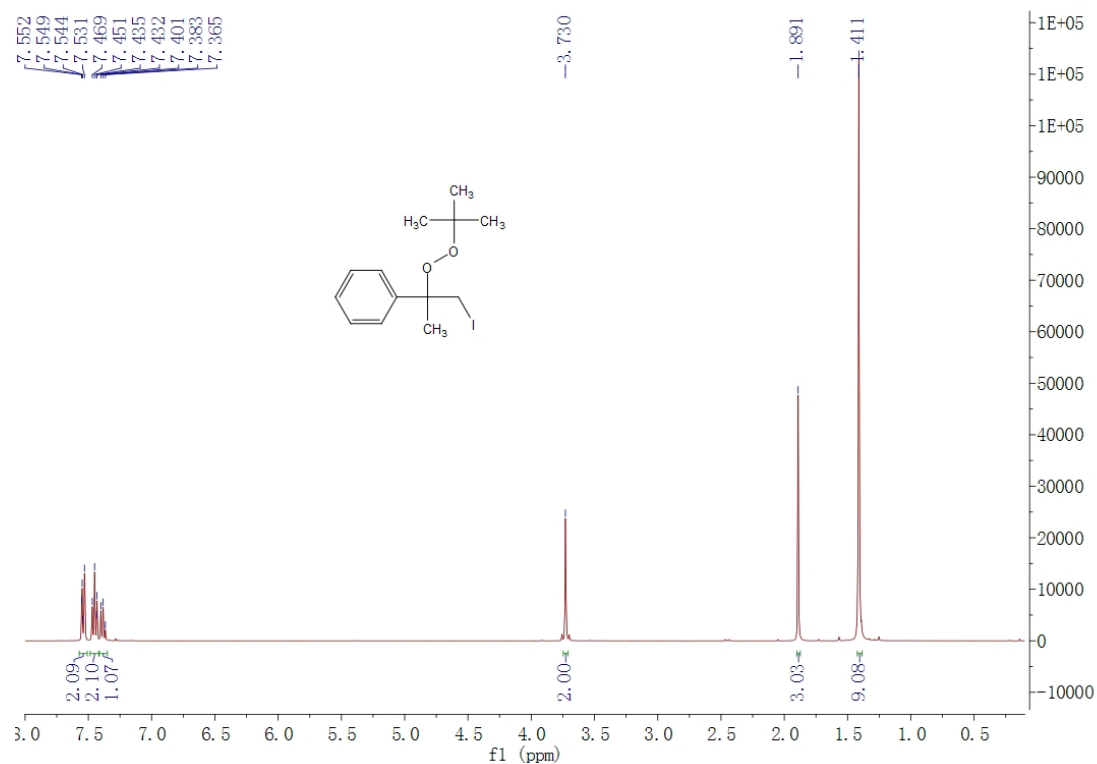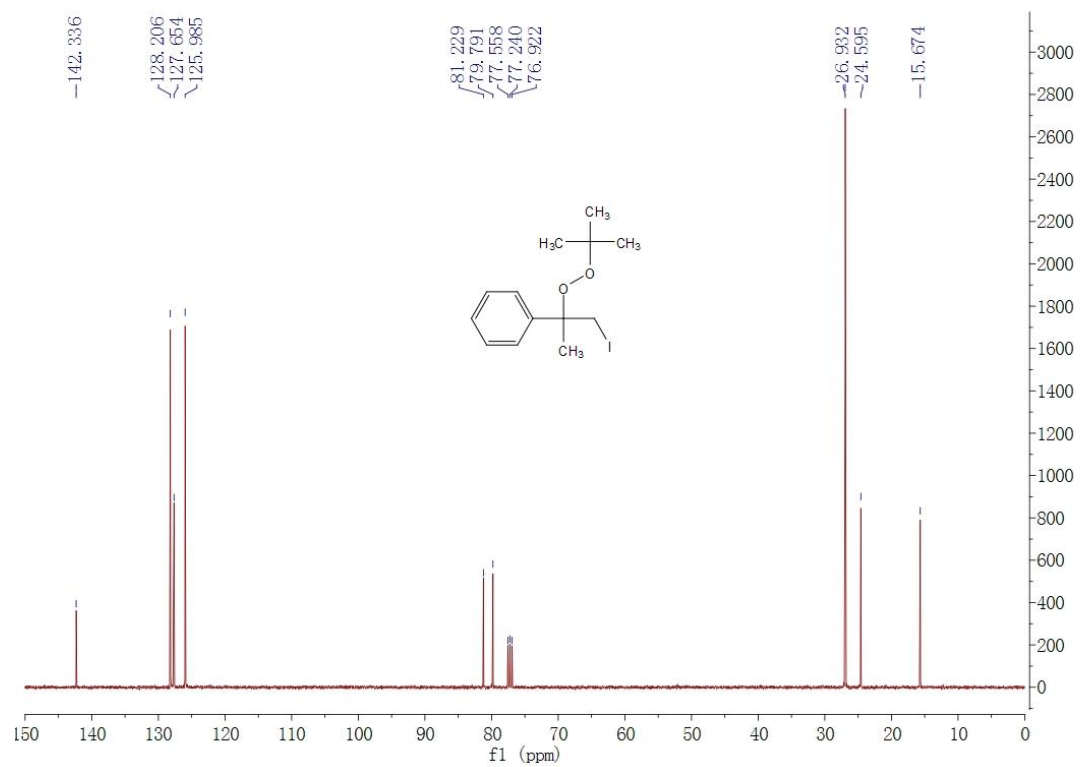

**1-(*tert*-Butylperoxy)-2-iodo-1,1-diphenylethane (2l)**

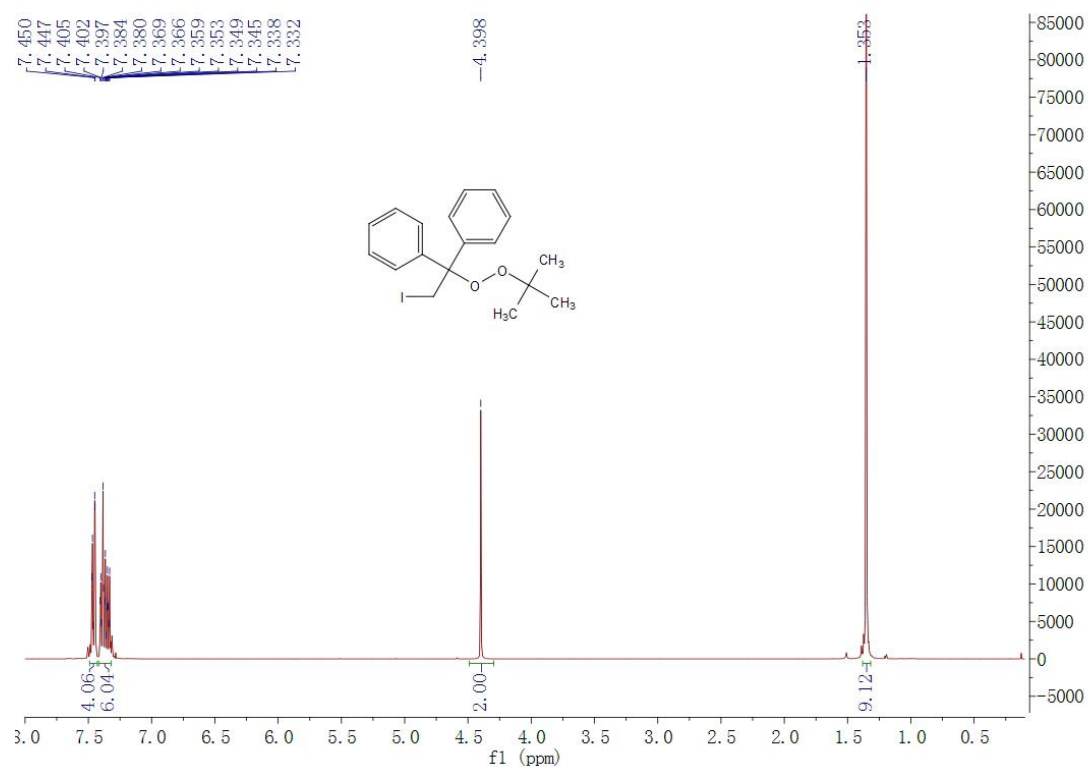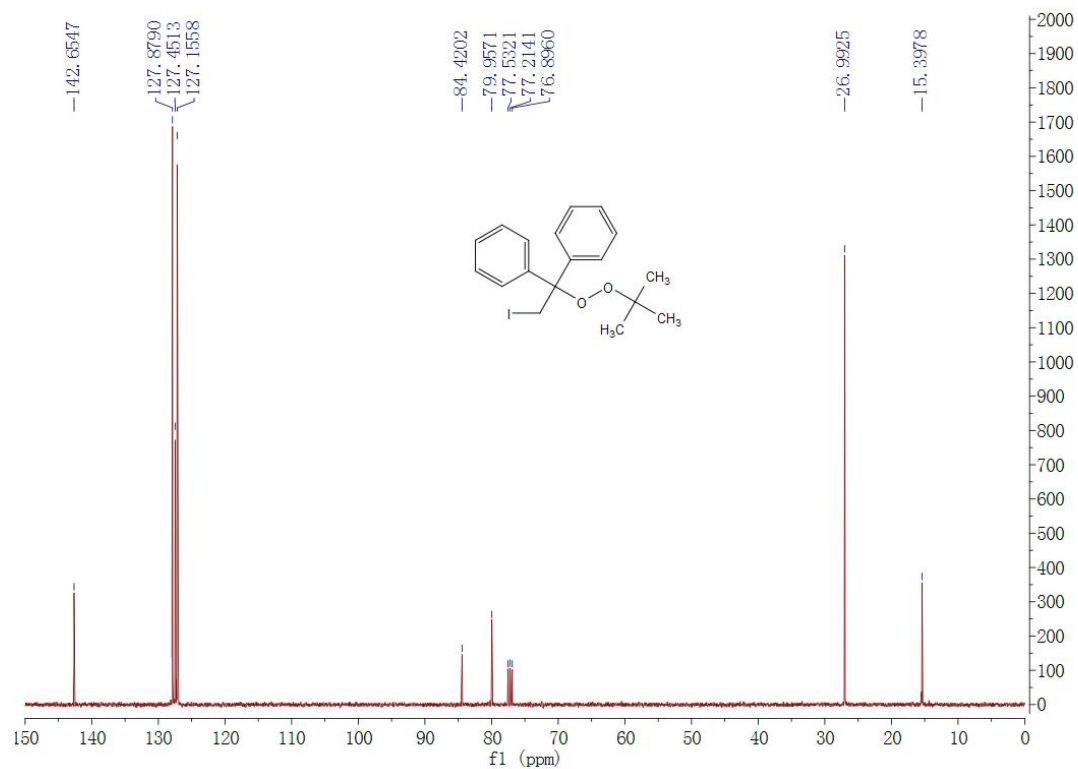

**1-(3-(*Tert*-butylperoxy)-4-iodobutyl)benzene (2m)**

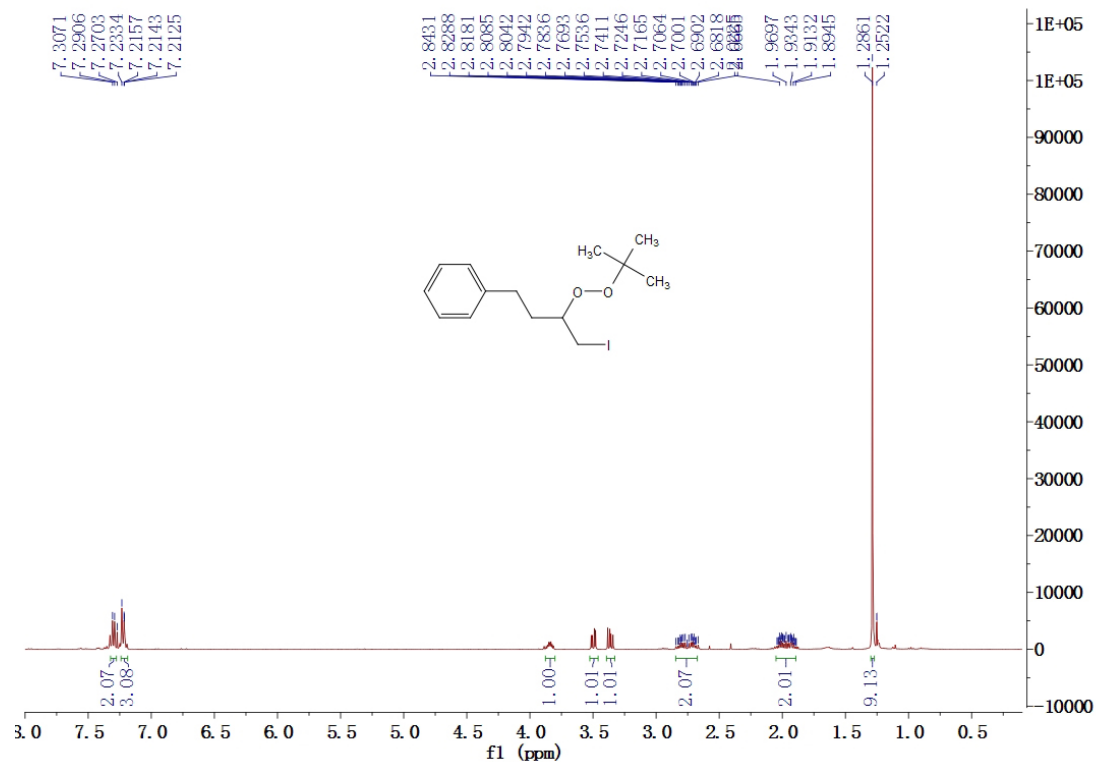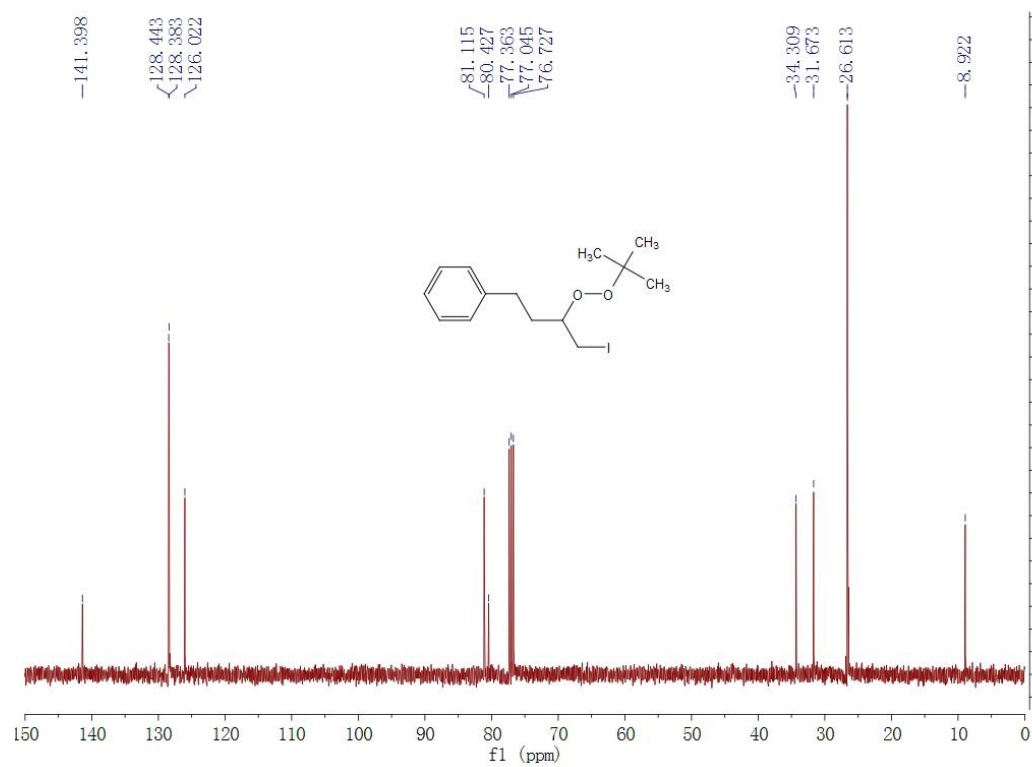

### 3-(*tert*-Butylperoxy)-3-ethyl-2-iodopentane (2n)

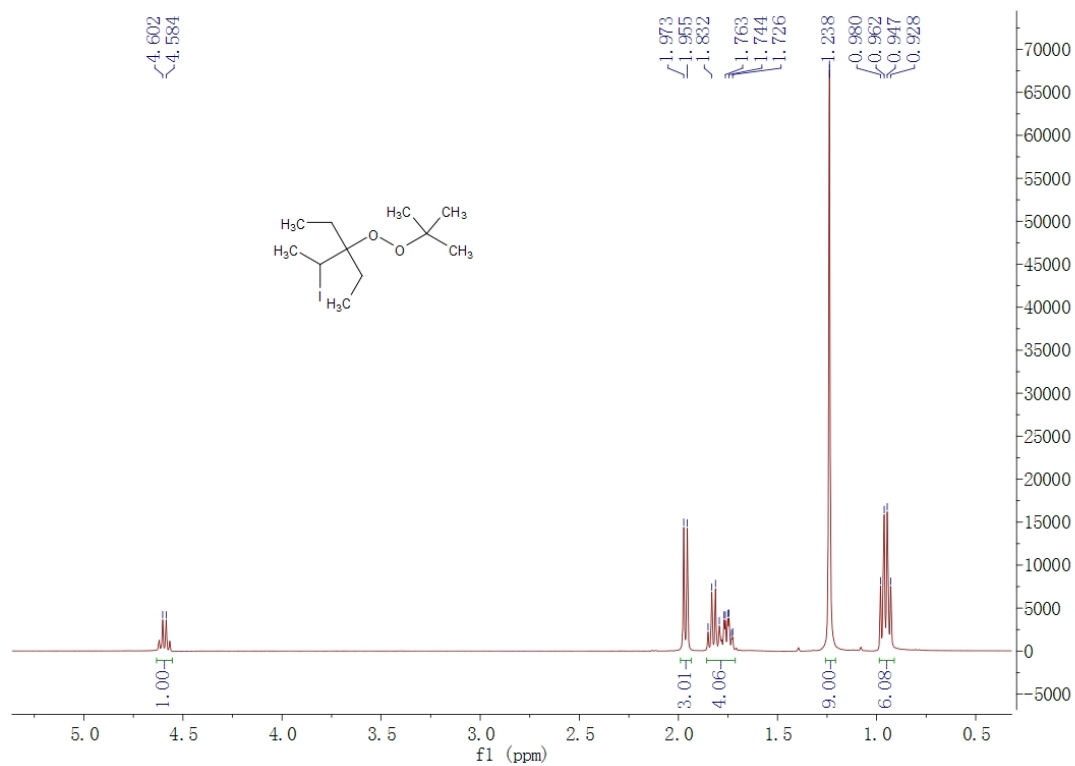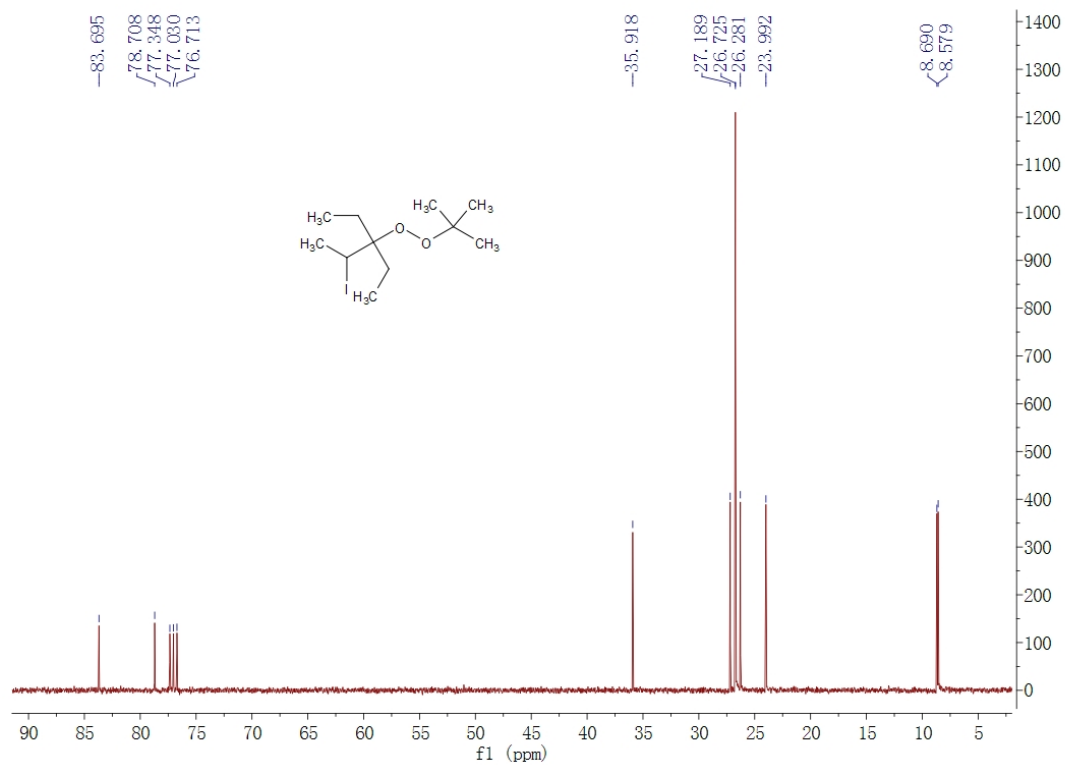

**2-(*tert*-Butylperoxy)-1-iodooctane (2o)**

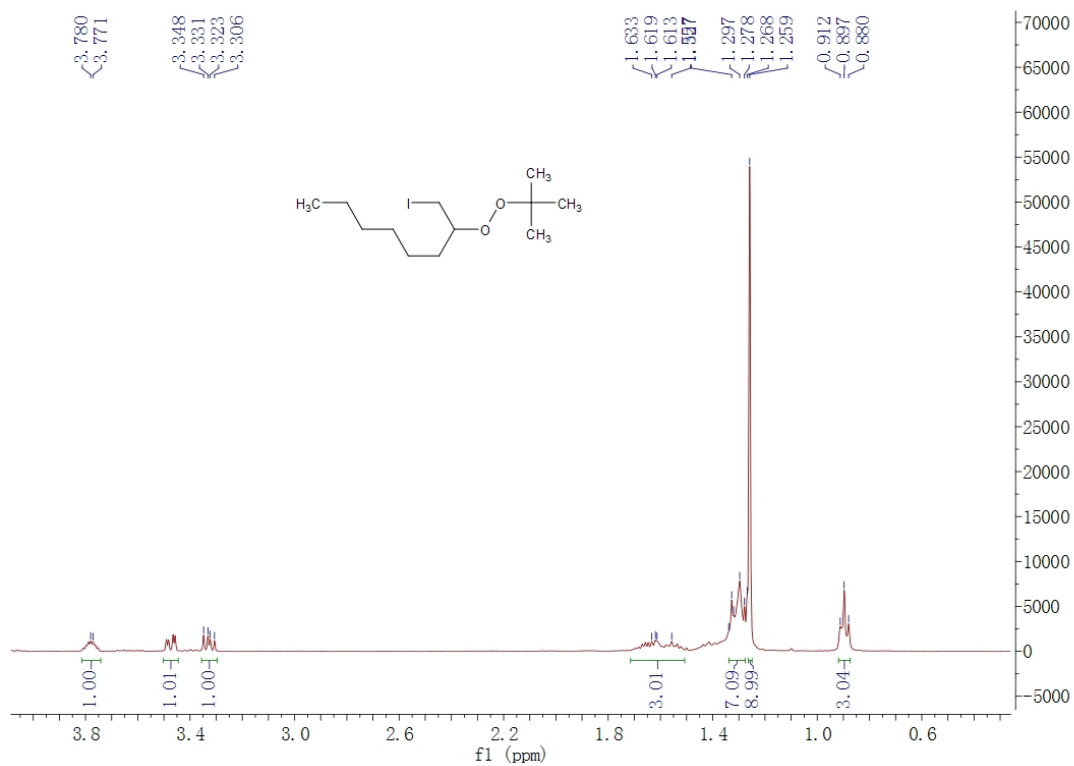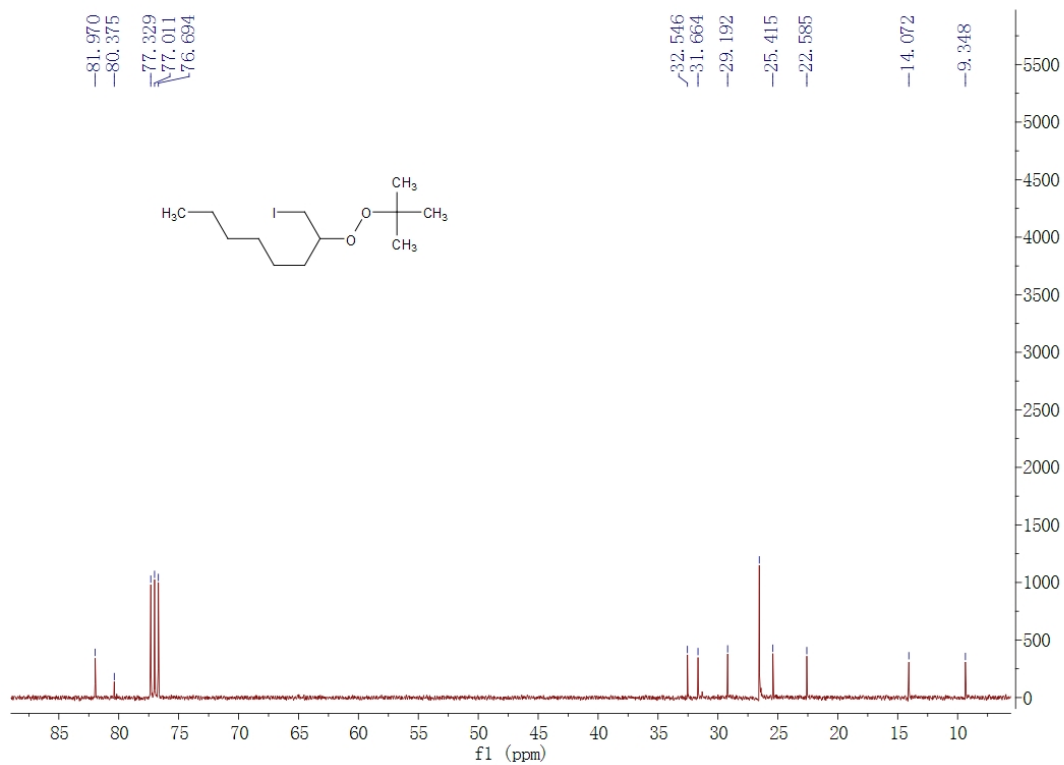

# 1-(2-(*tert*-Butylperoxy)-3-iodopropyl)benzene (2p)

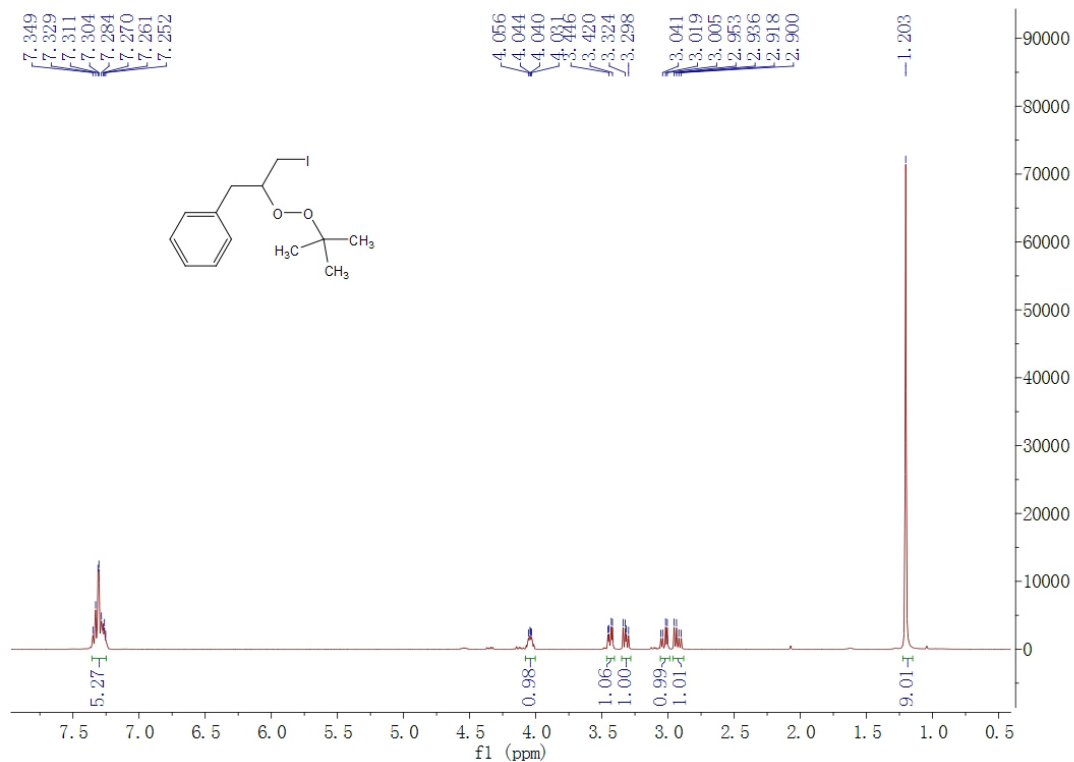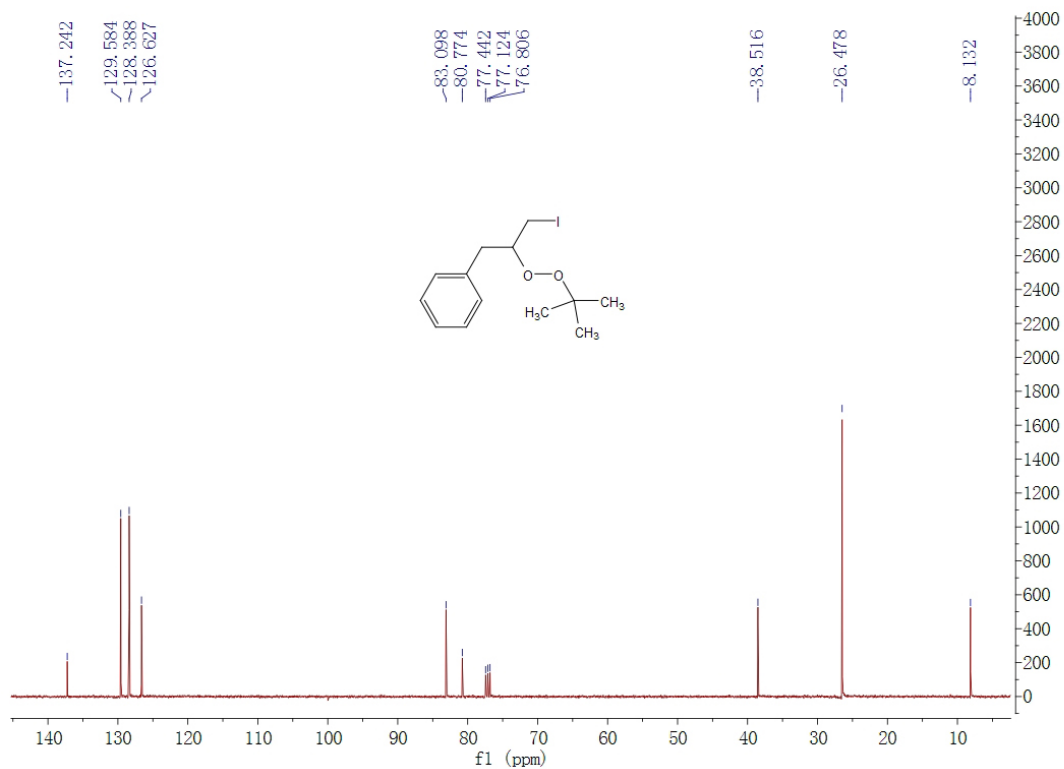

### 1-(1-(*tert*-Butylperoxy)-2-iodoethyl)-4-benzylbenzene (2q)

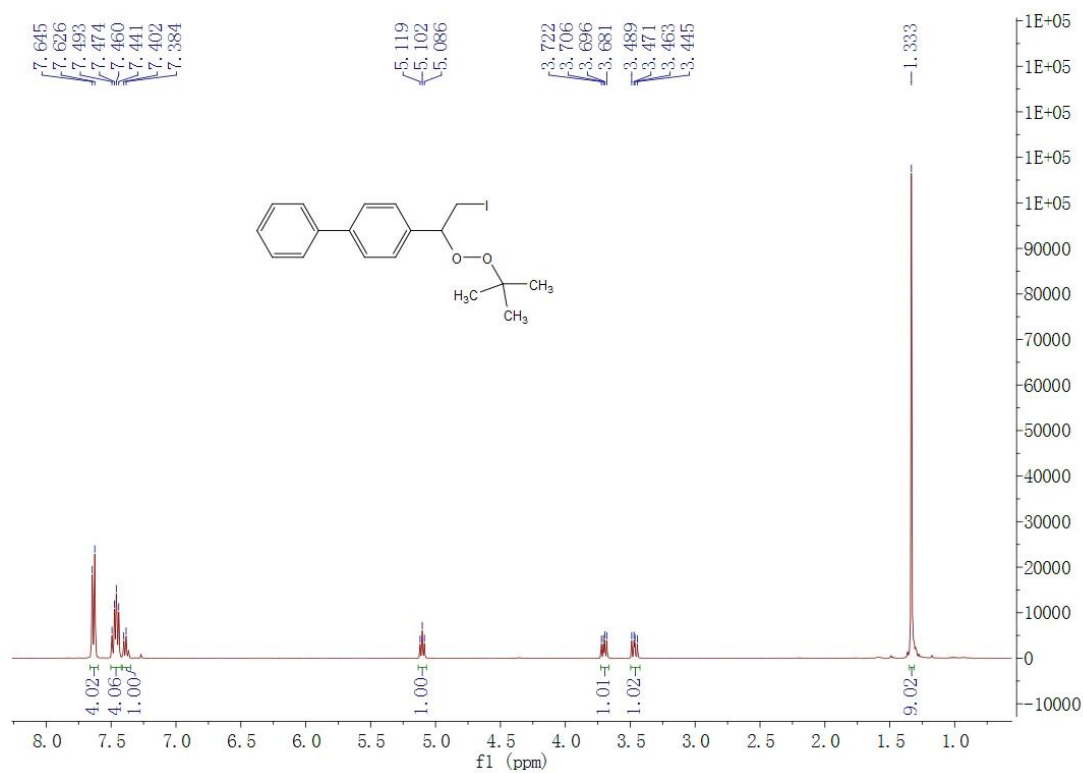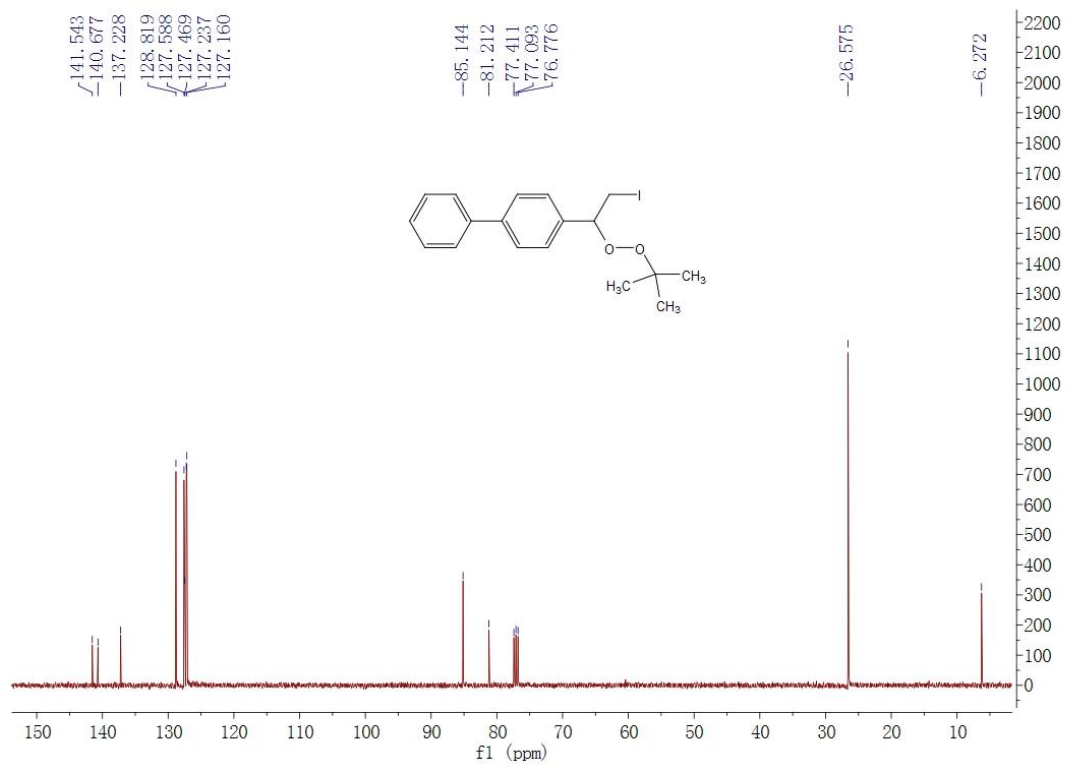

**1-*tert*-Butyl-4-(1-(*tert*-butylperoxy)-2-iodoethyl)benzene (2r)**

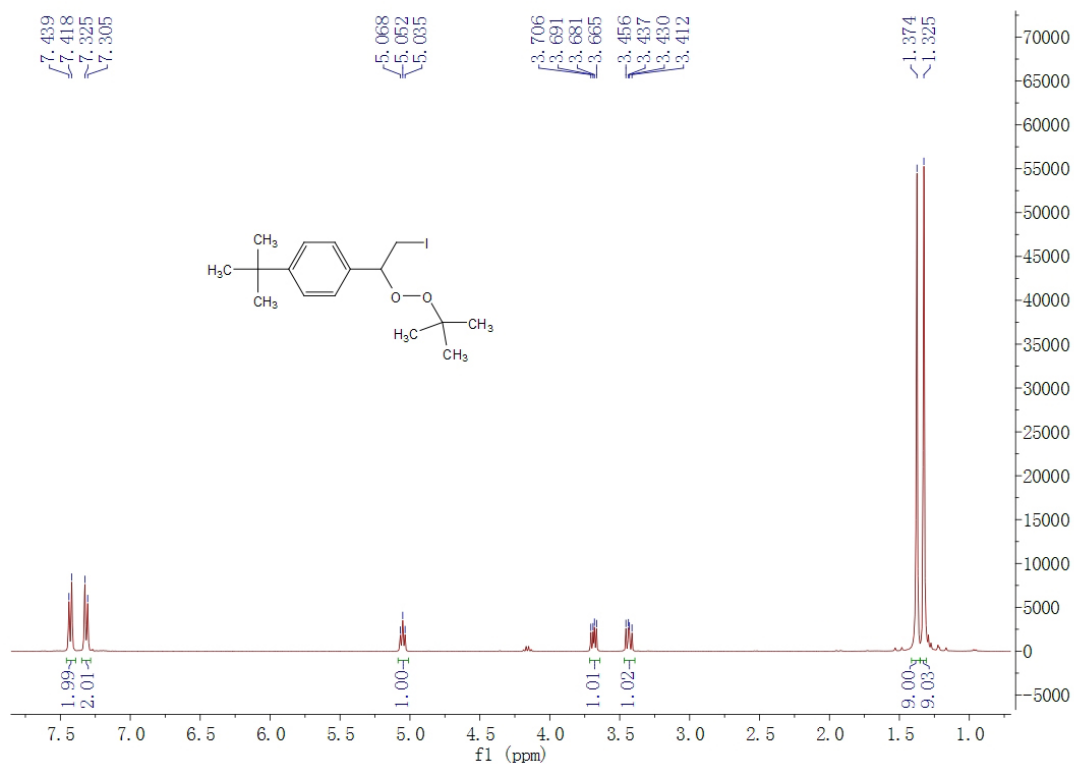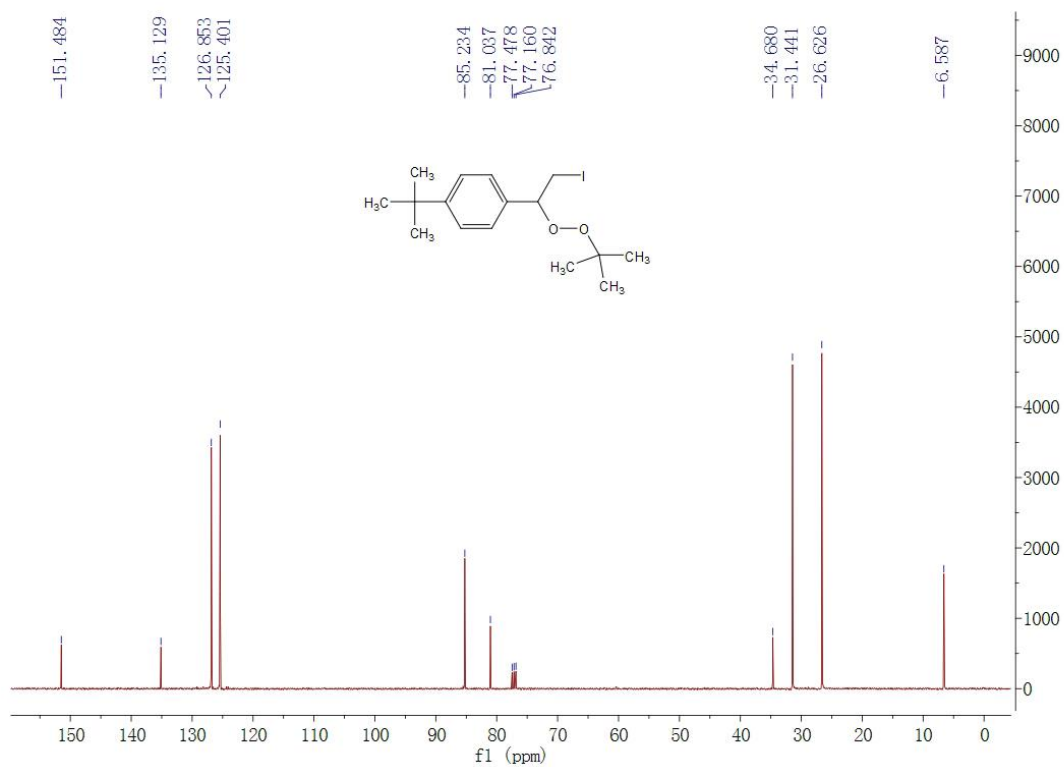



**1-(1-(*tert*-Butylperoxy)-2-iodoethyl)-4-(chloromethyl)benzene (2s)**

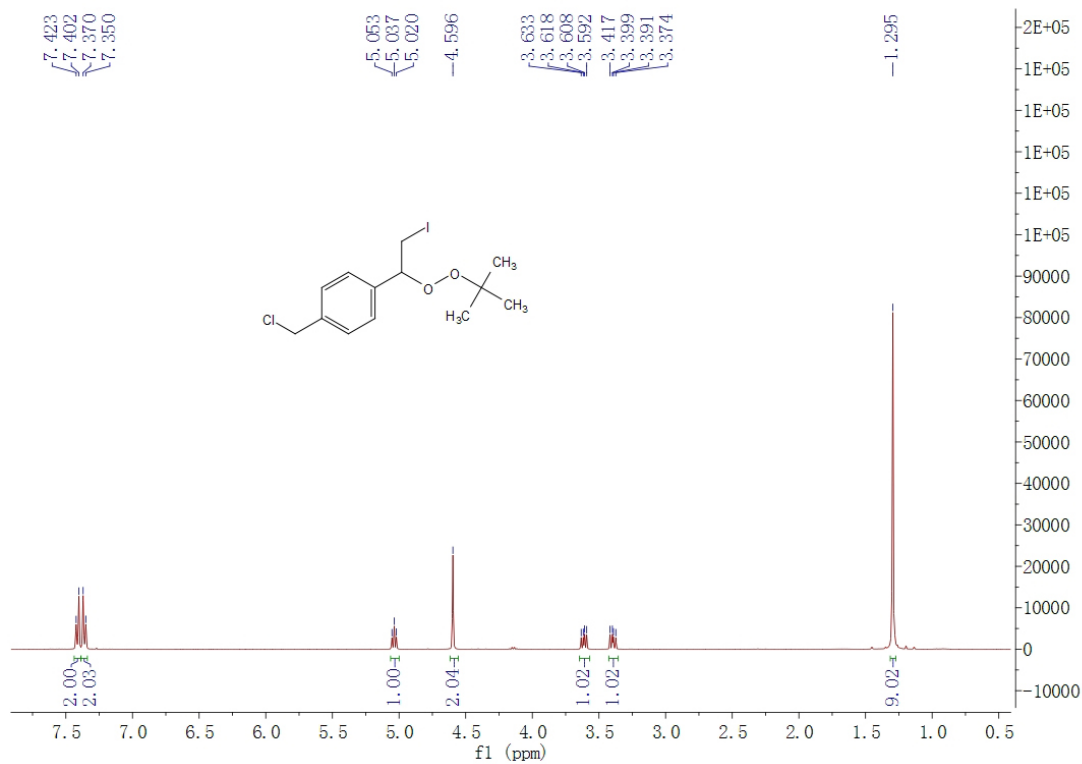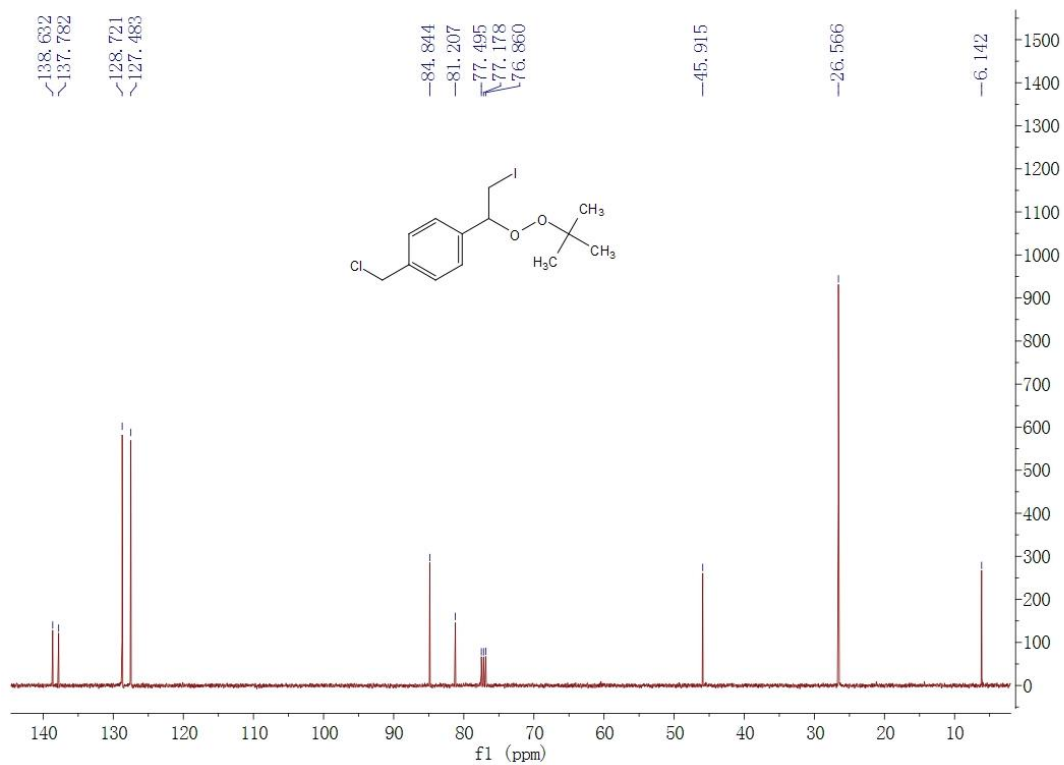

**1-(*tert*-Butylperoxy)-2-iodo-1-methylcyclopentane (2t)**

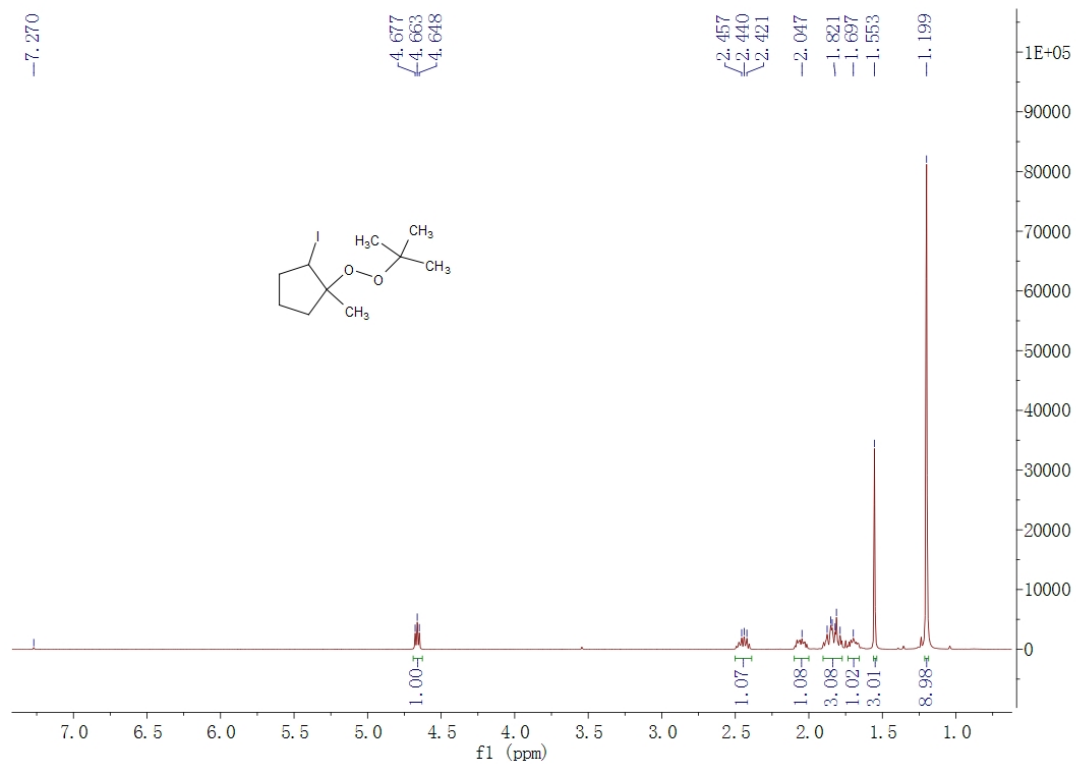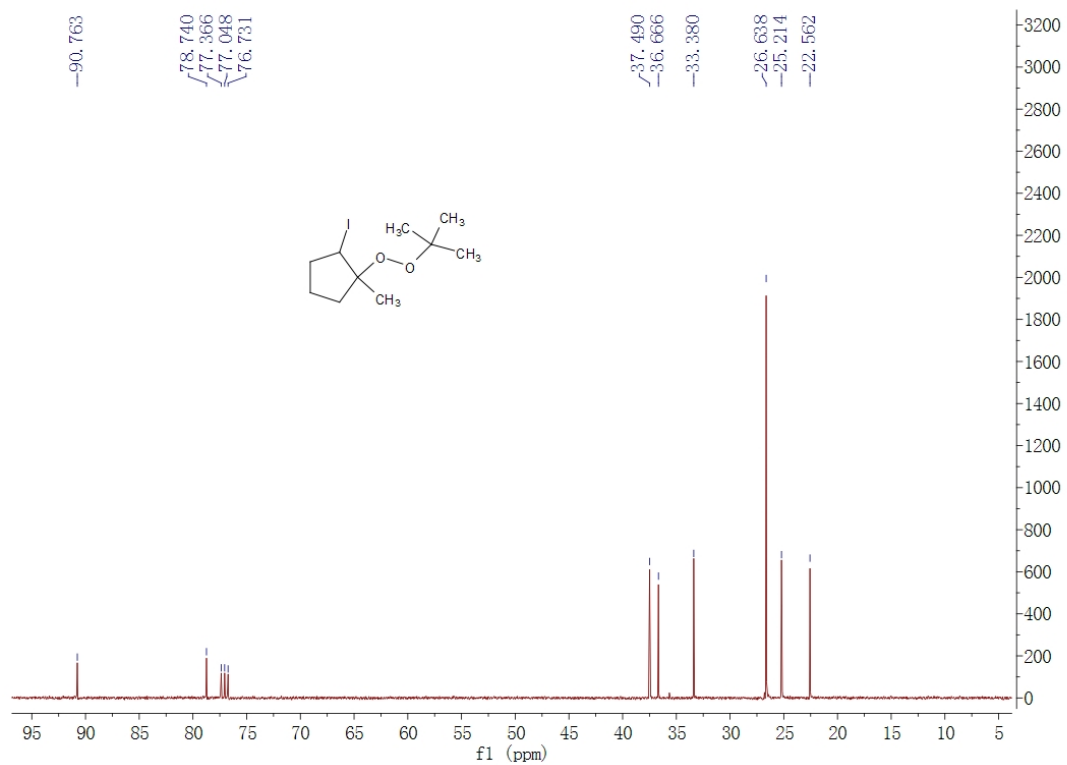

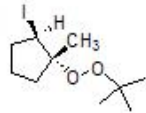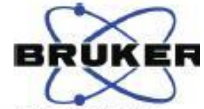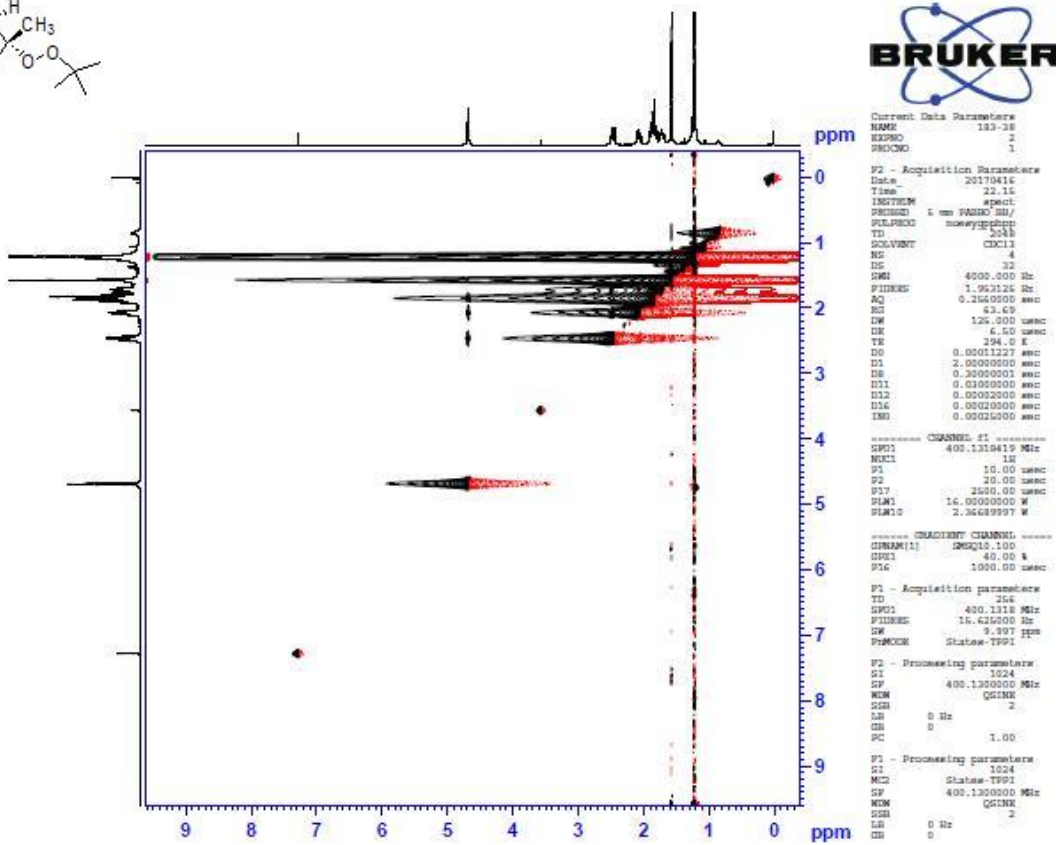

## References

- [1] Bloodworth, A. J.; Bowyer, K. J. *J. Org. Chem.* **1986**, *51*, 1790–1793.
